# Supplementary material for: miR156 switches on vegetative phase change under the regulation of redox signals in apple seedlings
Source: PubMed Central journal article supplement (PMC5660156; doi:10.1038/s41598-017-14671-8), 2017-10-27
Supplement: 41598_2017_14671_MOESM1_ESM.pdf [file 41598_2017_14671_MOESM1_ESM.pdf]

## miR156 switches on vegetative phase change under the regulation of redox signals in apple seedlings

Xiao Lin Jia, Ya Kun Chen, Xiao Zhao Xu, Fei Shen, Qing Bo Zheng, Zhen Du, Yi Wang, Ting Wu, Xue Feng

Xu, Zhen Hai Han, Xin Zhong Zhang\*

### SUPPLEMENTARY DATA

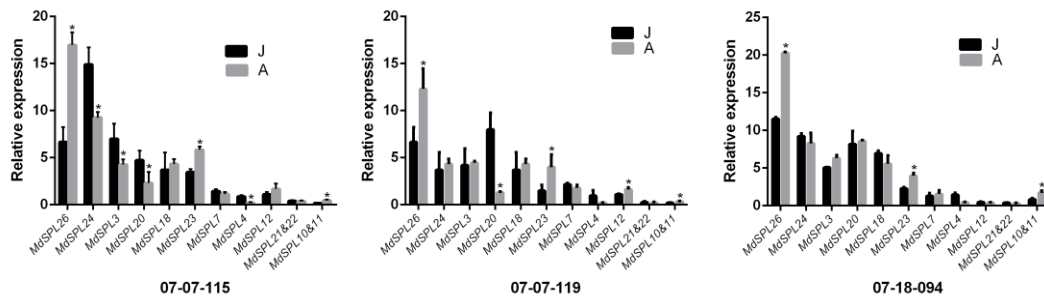

Fig S1. Relative expression of *MdSPLs* in the juvenile (J) and adult (A) phase of three individuals of *Malus*

*asiatica* 'Zisai Pearl' × *M. domestica* 'Red Fuji'. Error bars represent the SD of three biological replicates.

Asterisk represents  $p < 0.05$  (Duncan's multiple-range test).

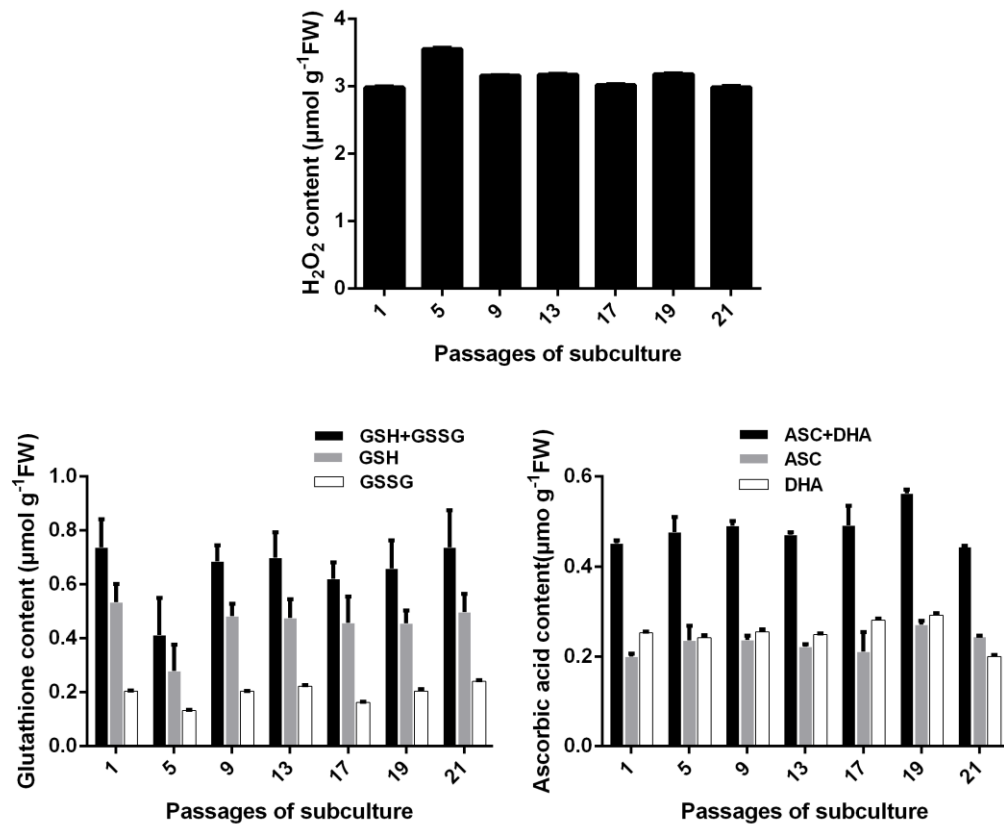

Figure S2. Hydrogen peroxide (H<sub>2</sub>O<sub>2</sub>), glutathione (GSH), glutathione disulfide (GSSG), ascorbic acid (ASC) and dehydroascorbate (DHA) concentrations in suspension cells of apple 'Orin' leaf during successive subculture cycles.

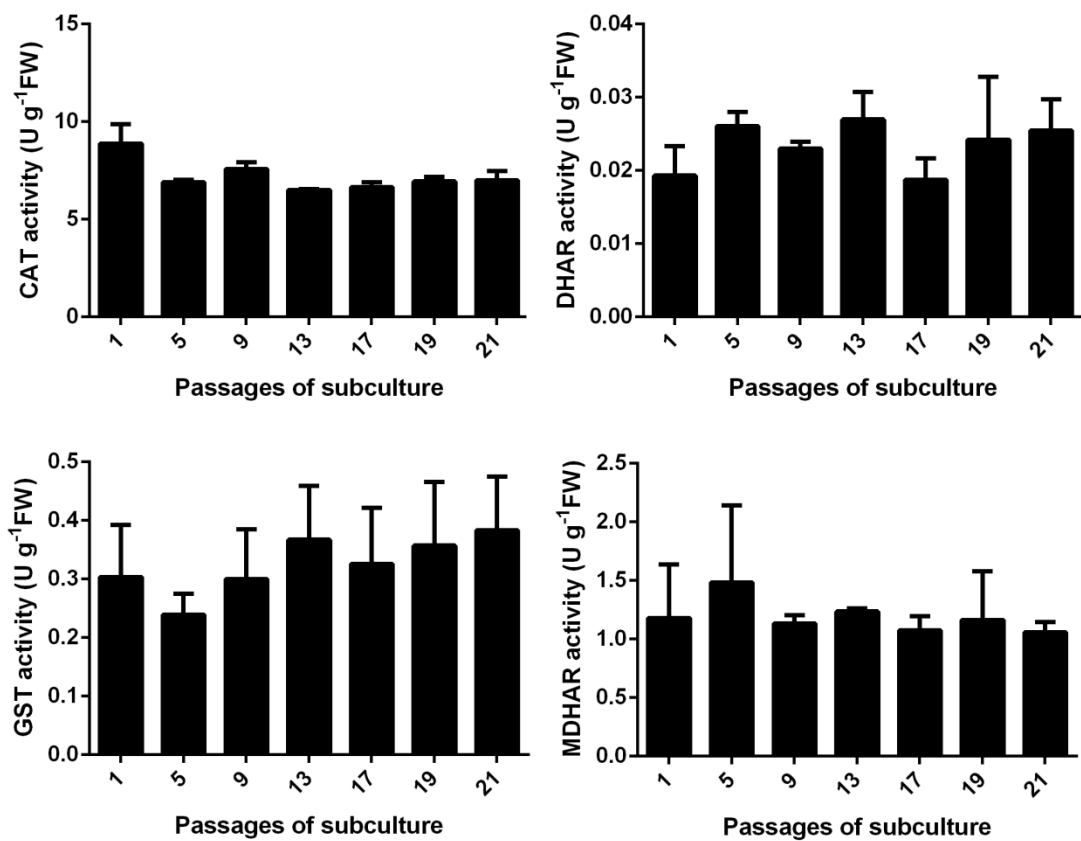

Figure S3. Activity of catalase (CAT), dehydroascorbate reductase (DHAR), glutathione *S*-transferase (GST) and monodehydroascorbate reductase (MDHAR) in suspension cells of apple 'Orin' leaf during successive subculture cycles.

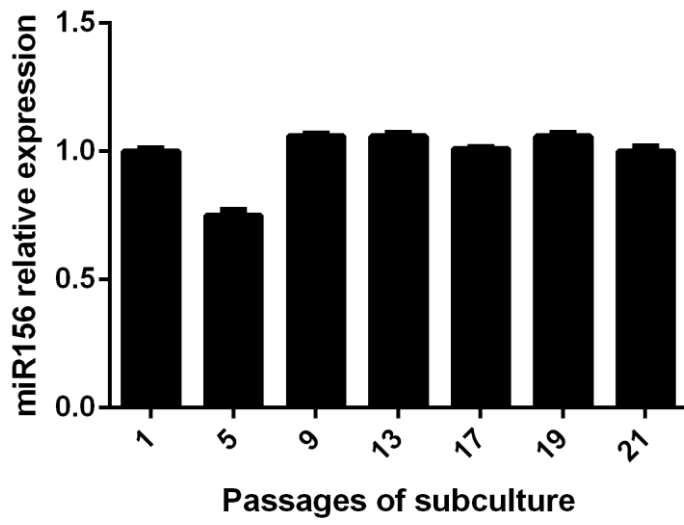

Figure S4. Relative expression of miR156 in suspension cells of apple '*Orin*' leaf during successive subculture cycles.

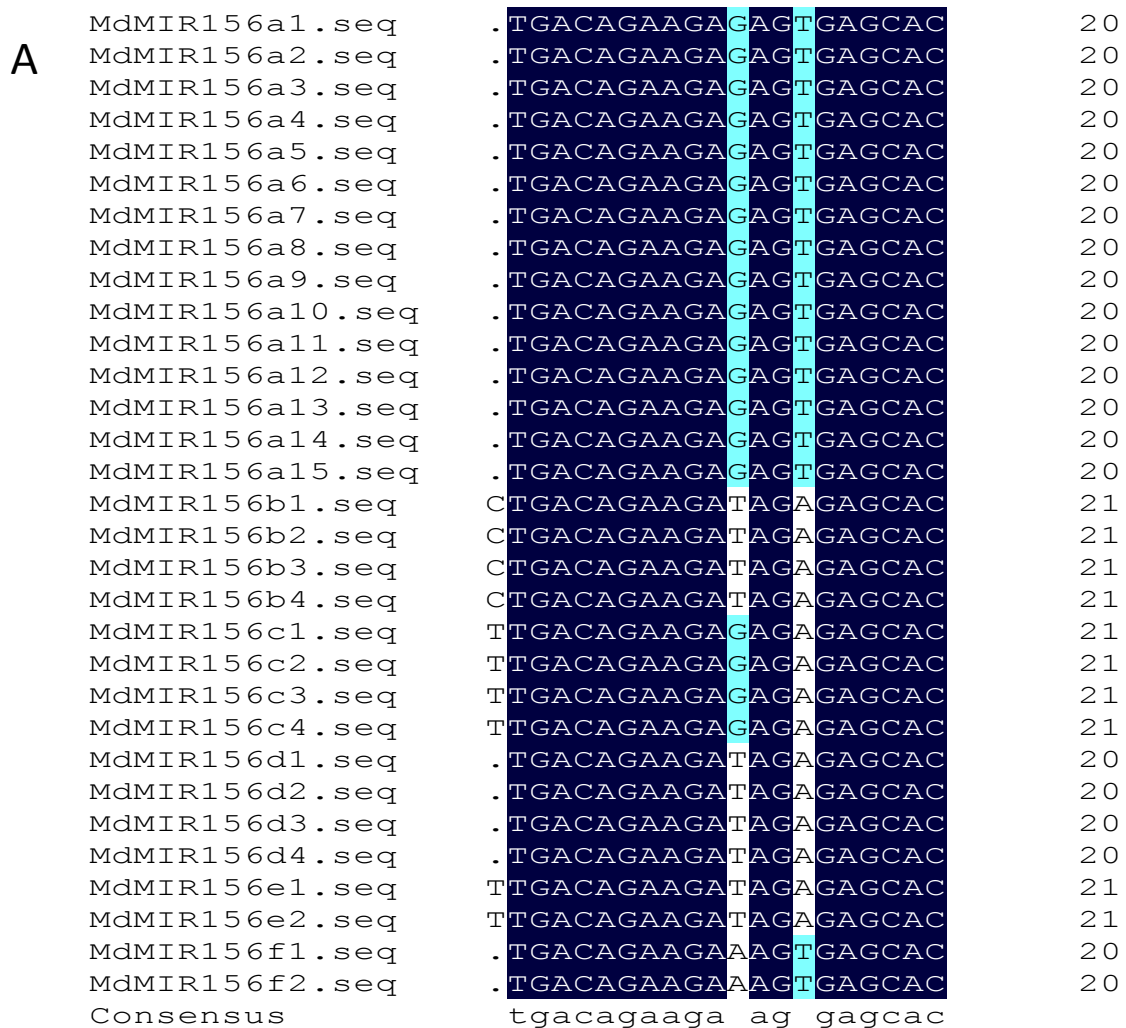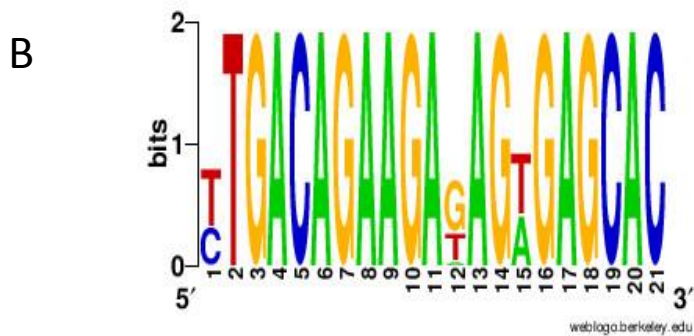

Figure S5. A. Multiple alignment of the MdMIR156s obtained with DNAMAN software. B. Sequence logo of the

MdMIR156s. The height of the letter at each position represents the degree of conservation.

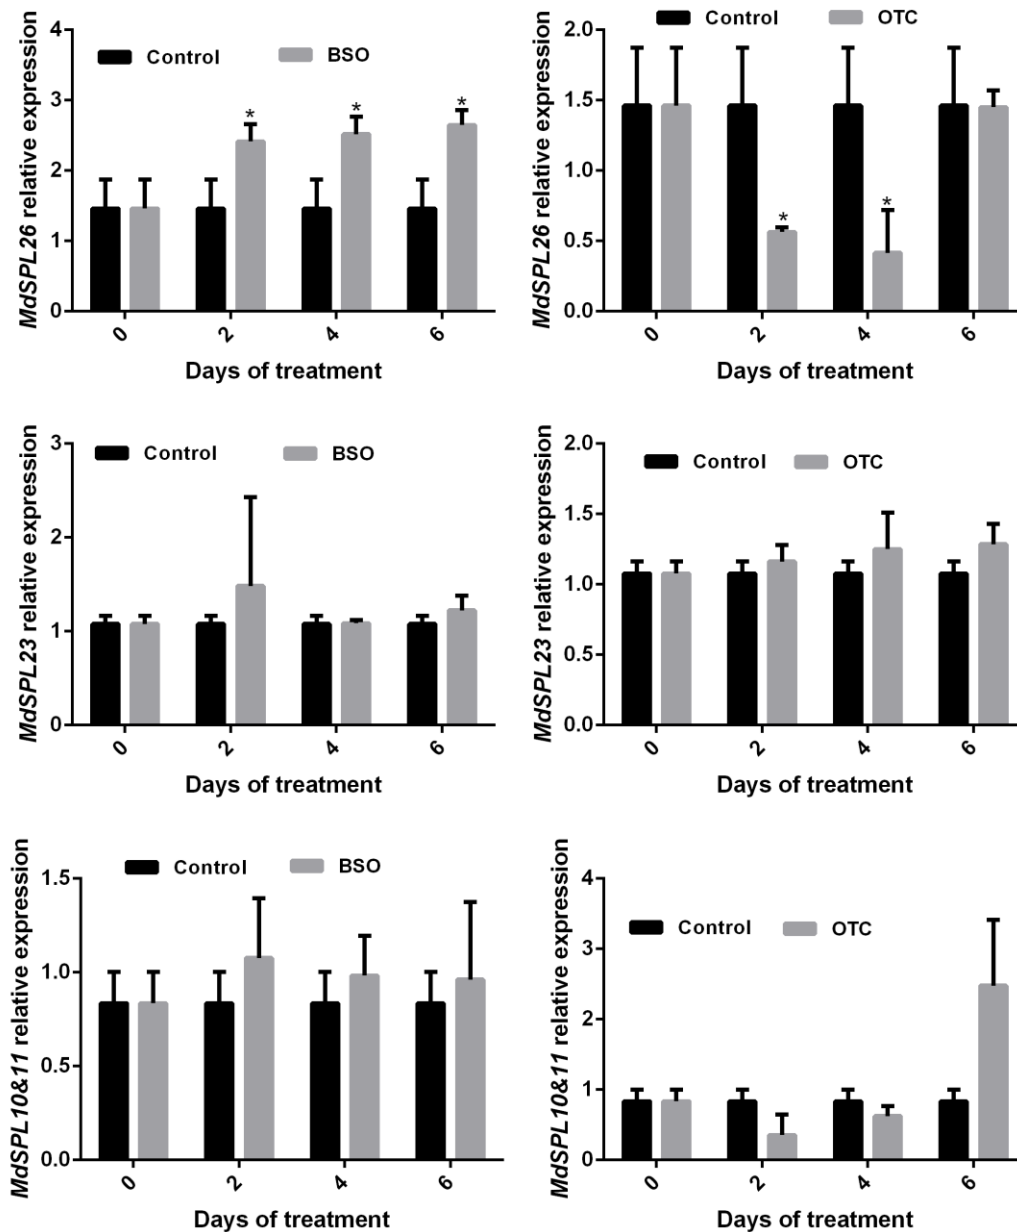

Figure S6. Relative expression of *MdSPL26*, *MdSPL23* and *MdSPL10&11* of suspension cells of apple 'Orin' leaf

treated with redox-modulating chemicals. The suspension cells were cultured for six days in medium supplemented with either 50  $\mu$ M L-2-oxothiazolidine-4-carboxylic acid (OTC) or 0.5 mM buthionine sulphoximine (BSO). Error bars represent the SD of three biological replicates.

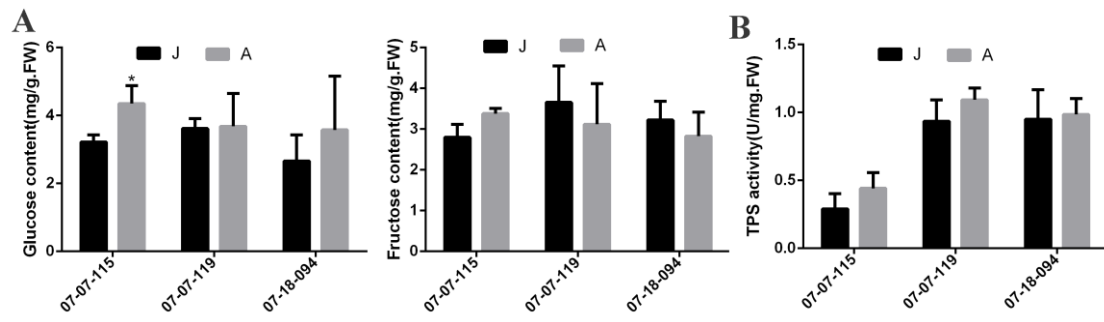

Fig S7. Glucose and Fructose concentrations (A) and activity of Trehalose-6-phosphate synthase (TPS) (B) in the

juvenile (J) and adult (A) phase of three individuals of *Malus asiatica* 'Zisai Pearl'  $\times$  *M. domestica* 'Red Fuji'.

Error bars represent the SD of three biological replicates. Asterisk represents  $p < 0.05$  (Duncan's

multiple-range test).

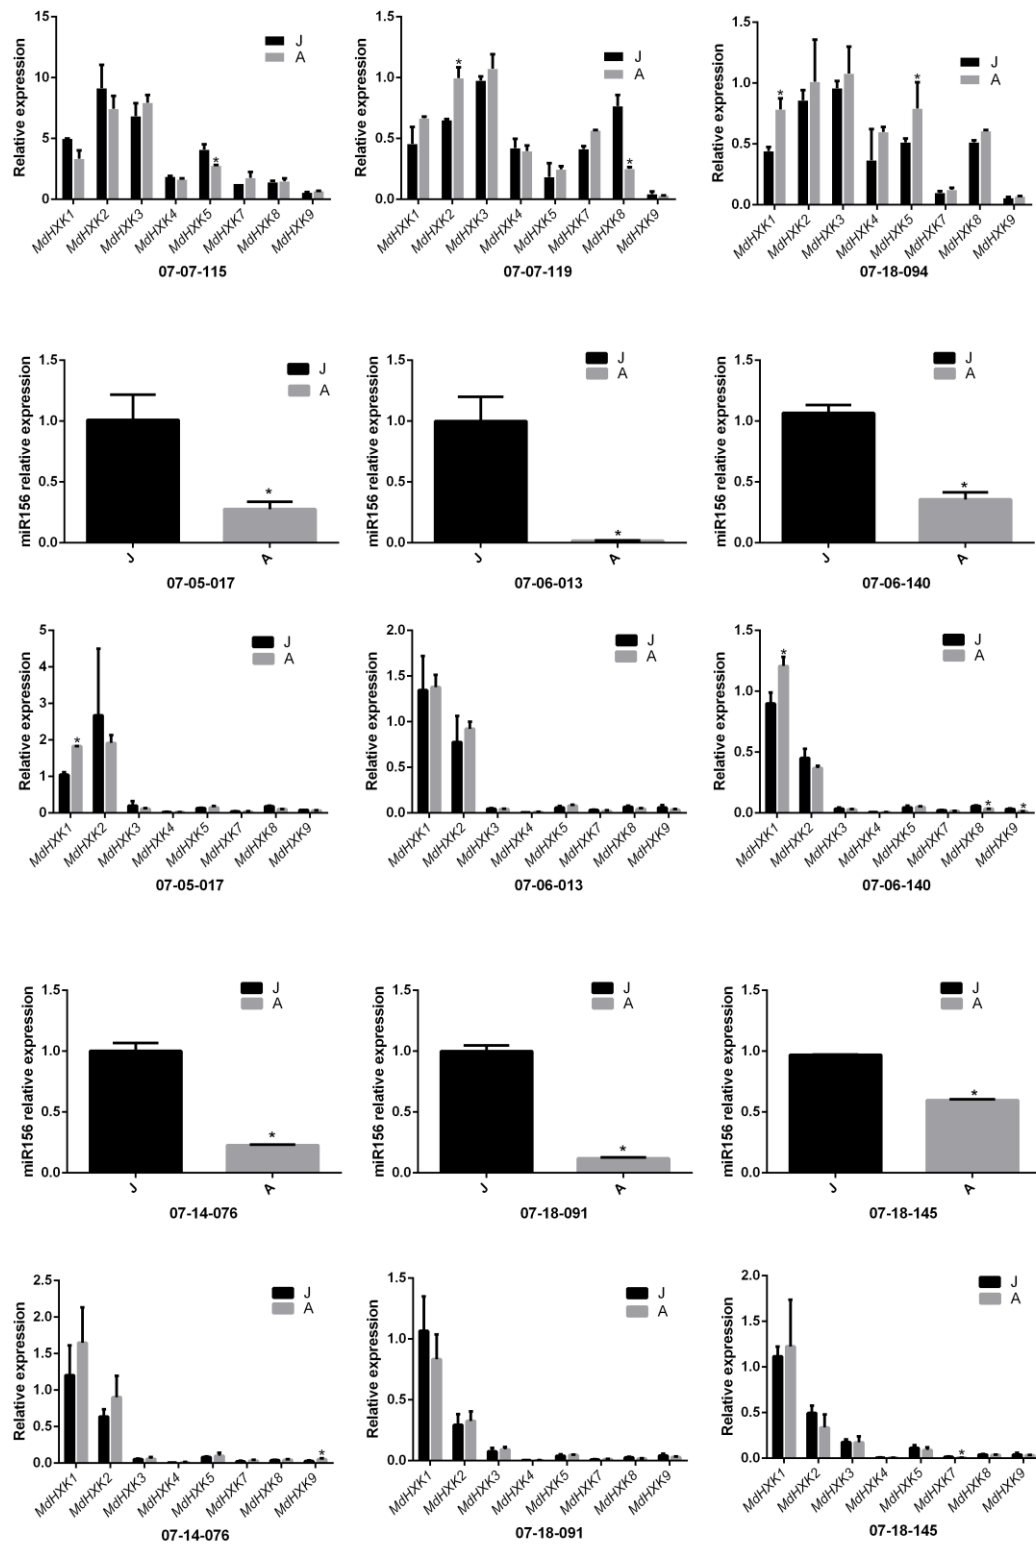

Fig S8. Relative expression of *MdHXXs* in the juvenile (J) and adult (A) phase of three individuals of *Malus*

*asiatica* 'Zisai Pearl' × *M. domestica* 'Red Fuji'. Error bars represent the SD of three biological replicates.

Asterisk represents  $p < 0.05$  (Duncan's multiple-range test).



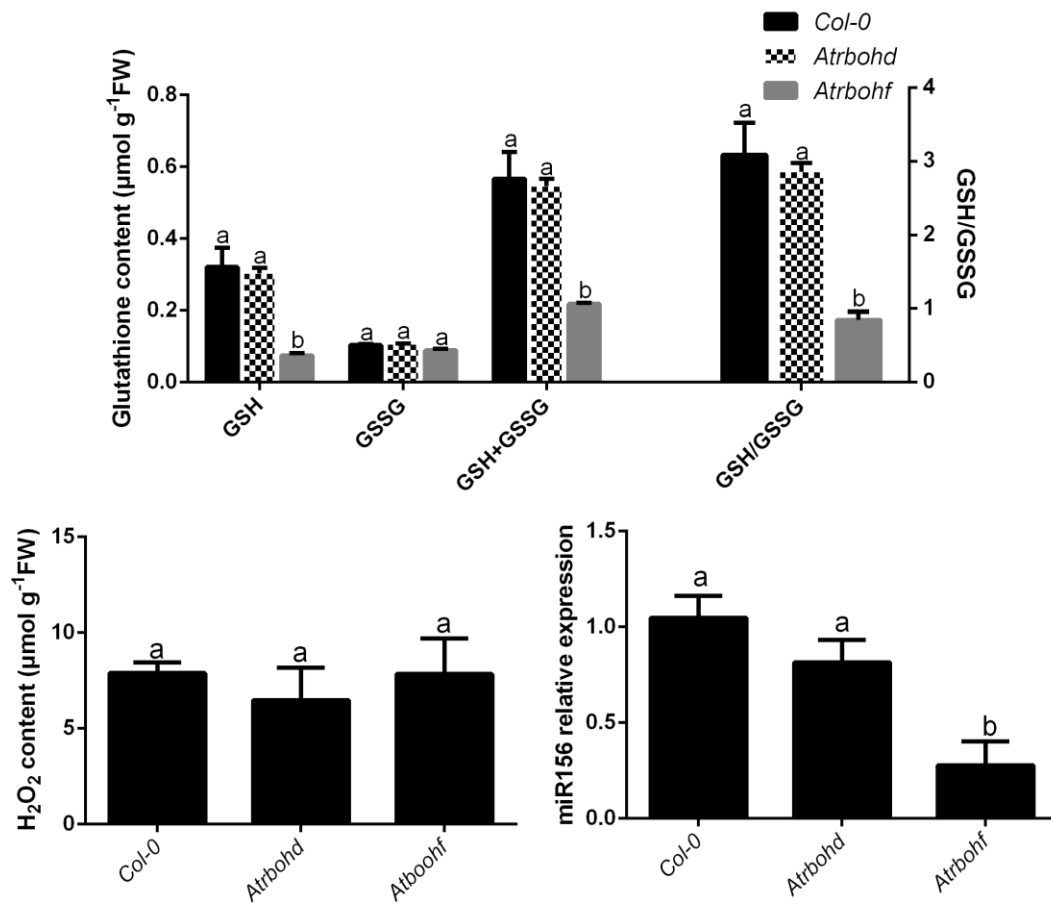

Fig S9. Glutathione (GSH), glutathione disulfide (GSSG) concentrations, GSH/GSSG ratio, Hydrogen peroxide

(H<sub>2</sub>O<sub>2</sub>) and miR156 expression in wild type and *rboh1*, *rboh1f* mutants of *Arabidopsis thaliana*.

Error bars represent the SD of three biological replicates. Different letters indicate statistical significance ( $p <$

0.05; Duncan's multiple-range test).

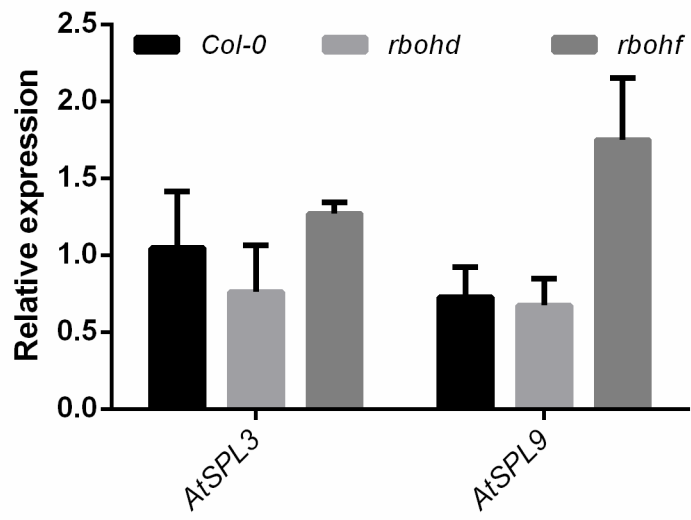

Fig S10. Relative expression of *SPL3* and *SPL9* in wild type and *rbohD*, *rbohF* mutants of *Arabidopsis thaliana*.

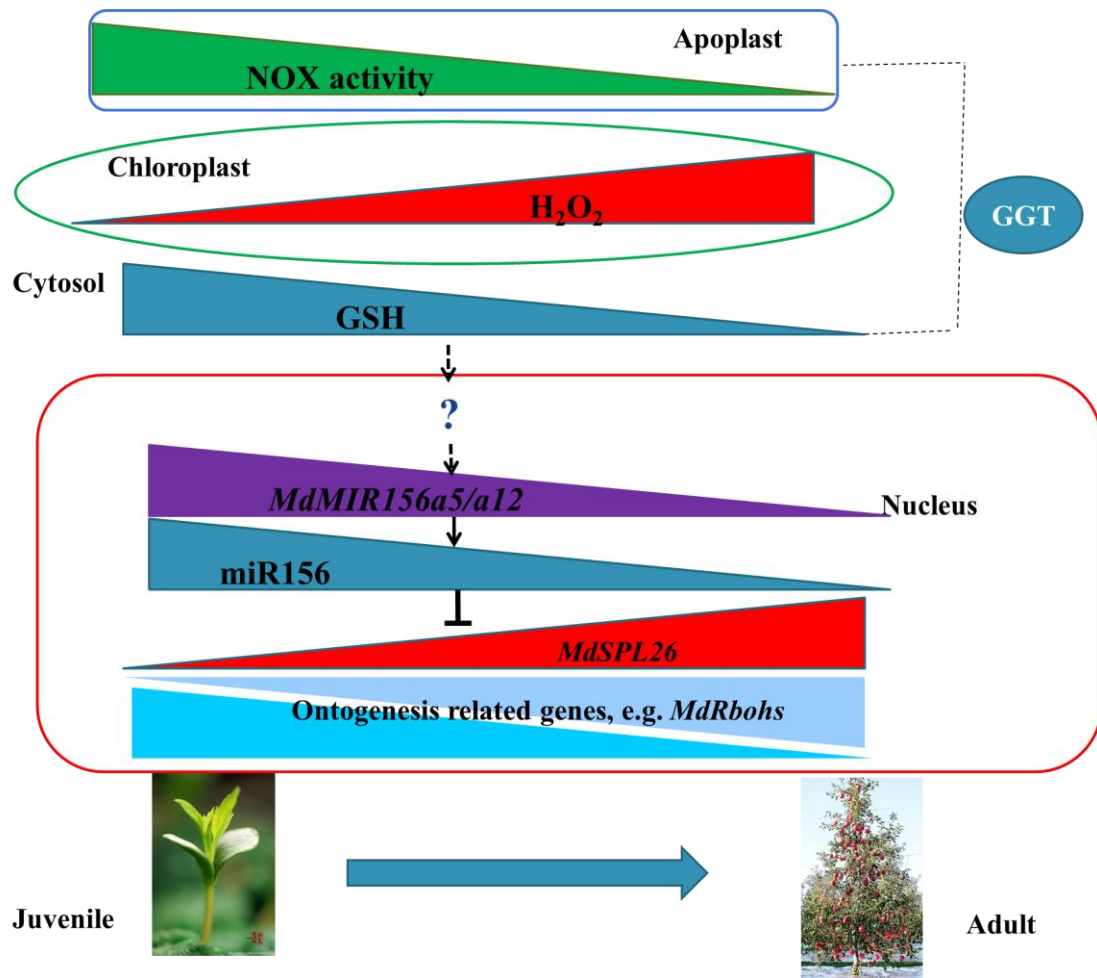

Fig S11. A model for the regulation of miR156 by redox signals to control vegetative phase change in apple

seedlings

### 1. The primary transcript sequence of MdMIR156s

The mature miR156 sequences were obtained from miRBase database (<http://www.mirbase.org/>, Release 21) and the plant microRNA database (PMRB, [http:// bioinformatics.cau.edu.cn/PMRD/](http://bioinformatics.cau.edu.cn/PMRD/)), then compared with the apple genome (<http://genomics.research.iasma.it/>) by BLAST. We selected the ~500bp upstream and ~500bp downstream of mature miR156 as the pri-miR156 sequence.

The positions of the mature miR156 embedded on each pri-MdmiR156 member were marked with red colored fonts.

The pri-MdmiR156 transcript, which has been experimentally confirmed to be pri-MdmiR156, was marked with an asterisk following its name and the corresponding reference (if there is any) is listed just behind the DNA base sequence.

#### MdMIR156a1

GTTTTAAAAGTTATTGTAAGAGGTAGTAATTGCACTTAAATATGAAGGTGAAAATGTAATTACTCTTTT  
TCTTTCCAAAGCACTGGTACTGCTACAAATTGGACACGTAATTGCTAGTGGTGCTAGTAAATTACTTTT  
GGTACTTAAATGTCGGGACATGATTCAGATGTGGATGGATCGATGGCAGTCCTTTTATYACCAACCAG  
GCTTTCACCATCAATAATGGAGACCAGAAATCAGGCCCTTGCTCAAGTCCTGATGAATTGAAAGATT  
YCGCGGTATACATAGTGAATTATCCTGGTAGATAAGGGCATTACGGAGCATTCCGAATTCAWAACCC  
TAATAAAAACGTGATATGACTCAAGTGAAAGGAAAGCTGCTAGGCTGACCATGGCACTKGGTGGTGTA  
ACTAATTAGCTATATATATATRTATATATGTATATTTGTGTATATTGGAAAGCAGAAAGAAACCTGTAGGTT  
AAGCTGAGCGTAGT**TGACAGAAGAGAGTGAGCAC**ACACAGGCGGYAATTGTATAAAATCATACTTTTG  
GGCGGTGCGTGCTCACTTCTCTCCGTCAGCTCCTATCTGCGCGCTCGCTGGCTTTATTTCACTT  
AATTTTGATCGTCAACGTTCAAAACCTTAATTTCTCATCAACGCCCTTCTCTTCCCGCAAAGGAATGG  
GAAATTAACCAGGCCAGTCCCAGGCTCAGCCCCTTCTACTTTCCCAATTCTCTTTCCAGGTGTTTTTC  
TCCCAACCCTATATGCATCTATCTCACATATATGAAACAGATAGCTAGATACCCTCTGATTCCCAGCTCTC  
ACTTTTCTTGTTTGGGAAATGGAGAAGTTGTGTATATATTTATAGATGTGTGTGTGGATCAGTGTATGTG  
TTAAAATTAAGACATATGACATAACTACAGGTTTTGGGTTTTGTTATTGTTTTTATCATCCTGTTCTTACTT  
ACTAACAGGTGTCCTCCAGTTTACGATCCGACCTTTTGGAAACGTAC

#### MdMIR156a2\*

TTTTCTTTCTCTTCGATCTGTGATTAATAAATTAATAATGGCATTAAATAATGGACGATGACCAATAGAA  
GATAAACCAGATTTATTCCATACGCGATGCAACTCCTGTTACTCCTCTCTTTTCTCTTTTTTCTTCTA  
TATAAAGCCCCAACAGGCCCTTGCAATTTCTCATAACAAAGCAAAGCAAAGCAAAACAAGGGTAAGCT  
ATATTAGGGTCCCTCGACGGTGCAGAACCGAGGATGAGTAGAGTGATAGATTGGGGTTCCCTTCCCG  
GTGAGGTGCAAKAGAGCGACCTAGAGATTAGGGTTTGAAACCCTCCAAAAAAAAAAAAAAAAATGTAAAC  
CCTCCAAAAAGAAAAATGTTCCAATCTCAGAGAAAAATTTGGGGKTTTGGGGGATAAACAGCTA  
GGGTTTTTTGGAGGCTCTTTCTCTTCTCTCTCTGTCTCTGTCTATGTGCTGCAATATTGAAGAGAACG  
TTTTAAAGGGTAAAGGGCGT**TGACAGAAGAGAGTGAGCAC**ACATGGTACTTTCTTGCATGCTGGGTT  
ATGYTCGAAGCTTTGCGTGCTCACTCTCTATCTGTCAACCCACCTATCTCTCTCACTCTCTGAATCA  
TGTTTTGTTTTGTATATTTGCGTTTACAATTTTTCATGAATTTTCTGCTTATAAATTTGCTCCCAGAAAATA  
ACTACTRATCAGACGGCGTCGATGGGGATCTAGACTGGATCATTAAATTCATCATGTTGTCGTGGTCA  
CAGAGATTTATCGATTTYGACATGTCGGTCTYAAACTATGTAGGGATTGGGGATTAGGGTTTCTTAGGG  
TTTTTATTTTTATTTTTTATTTATTTGCTATCGAAATCCCTTTTTATTAAGCATTGAATTGGTTGCGGACTTC  
AAGGCCGATTCAGAAGCAAAGAAAAATATCCCCGTTTGGGCAGGTGAATTTTGGTCTCTCTTGGCAT

AATTGGTACAATACCATAAGGTTGAAAGCT GAAAATTTATCTTTATGGACCA

Sun C., Zhao Q., Liu D. D., You C. X. & Hao Y. J. Ectopic expression of the apple Md-miRNA 156h gene regulates flower and fruit development in Arabidopsis. *Plant Cell Tiss Organ Cult.* 112, 343-351 (2013).

**MdMIR156a3**

AATCATGAACTGGAGGACACCTTTGAGTGAGTAAGATCAGGTAATAAAAAACAATGACAAACCCAAAA  
CCTGTATGTCTTATGTCTTAATTTAATACATACGCTGATCAACACAGACATCTATAAATATATGAATATAC  
ATACAACATCTCCATTTCCCAAACAAGAAAAATAAGAGCTGGGAGTAAGAGGGTATCTAGCTATCTGTT  
TCATATATATATGTGTGTGTGTGTATATAAATATACGGTGGAGGGAAAGACACCTGGAAGAAGGAGA  
ATTGGGAGAGCAGAAGGAGGCGGGCCCTGGGACTGGCCTGGTTTGATTTCCCGTTCCTTTGCAGGAA  
AGAGAAGGGGCTTTGATGAGAAATTAAGTTTTGAACGTTGACTACCAAAATTAAGTGGTGAATAAAA  
GCCAGCGAGCGCGCAGATAGCAGCTGACAGAGAGAGAGGTGAGCACGCACCGCCCAAGGGTATGAT  
TTTATACAATGCTGCCTGTGTGTGCTCACTCTCTCTGTCAACTACGCTCAAATTAACCTACAGCTCTC  
TTCTTTCTTTCTAATACATACATATATATATATAGCTAATTAGTTACACCAAGTGAATGGTCAGCCTAG  
CARCTTTCTCCACTTAAGGAATATCATGTTTTTCATTAGGGTTATGAATTTGGAATGCAGTGCGAATGCC  
CTATCTACCAGGATTATTAATACTATATACTCGCGGAGTCTTCAATTCATCAGAGGAAGGAGGGCGGT  
TGATTTCTGATCTCCATTATTAATGGTGAAAGCCAGGTTTGTGGATATAAGGACTCATCATCCATCCATAT  
CTCAATCGTGTCTTGCATCCGACGTCTCAGTACCAATAGTAATTCACTAATACCCTAGTAATCCATG  
TCGAATTTATAGTAGTACTATTTGGAAAGAAAAACGAAGGAACTCTCTCAAAAGTGGAGTATYCAT  
AGGCTCCATCATCTTATGTTTTTRACATAATTTTCATGCTAATATTTAAAA

**MdMIR156a4**

TATTTTACTATAGTAAATCTTGAAAGAGGAAAACAAAGAAGCTAGGGCTAGAAGATTAGATCTGTGATA  
CTGATAAATGGTGATGAAACCTGAGACTCAGTTATTTATCAGTGGAACCTTGAGAGAATGGATGCACACT  
AGTSTATACTACTGGATATCATCTTCCAAACGAGAAGAAGGGCAWGGTTCGGAGGGTCTGCCTGGGA  
AAATGAAAATGCAATAATAATTGATTGAAAAAATAGATATAARGGGRATAAATAAATAAATTCAATCTT  
ATCTTCTTGAAAGAATGAAAGAAAGAGTACACCTGGAAAGTGGAAGCTGASACGGTAGTAGGTAGMA  
GAACTGAGAGAGATCGAGAGGAGGAACACAGAAAGACATAATGAAAGGGAGGGCAGCGCAGGCGG  
TGGGCGGTGGGCGGYGGGCGCGTGC GGCTGACAGAAAGAGAAGTGAGCACACATCACGCAAAGGT  
ATGGCTTTATACAATTGCCCGAGTGTGCTCACTCTCTCTGTCAACCACCTCGCTACTAGTCCAGTGAT  
CTACTWCTCTCCCTCATCCAYTCACCTTCTCTCTCTSCCTCTGTCTCTCTCTCTATCTCTCTGTCTCTC  
TCTGCTACTTGGTCTTTATATTAGTATATTACACTACTTACAGCAGCTTTTTTTTCAATCTTCTATTATTG  
CCGACAACCTCCATTATCTATATATCTTCTTCCCTCGACTAAAATAGATATGAAGATCTACTAACACACCATA  
CTCCCCACTCTACTCTAGCTAAAGTTCATTTTGTATAGAAGGGACTCGTGACTCAACTCGTCAAGAGCA  
TGTACCATCGAATATGAGGTCATGAATTCAAGTGTCTTCTCTCTGCTATCATTTTTATTAGAATTA AAAA  
GTAAAAATGTTTACCTTATGTAACCTTAGGCGCGTCTCTTTATATTGAACCAAAAATAAAAAATTGGGTATC  
AGTAAGGATTACTATGTGTTTACTAATCTCTGAGAATCAAAACACAAAC

**MdMIR156a5\***

CCTGTAGTTATGTCATATGTCTTAATTTAACACATACACTGATCCACACACACATCTATAAATATATACA  
CAACTTCTCCATTTCCCAAACAAGAAAAGTGAGAGCTGGGAATCAGAGGGTATCTAGCTATCTGTTTC  
ATATATGTGAGATAGATGCATATAGGGTTGGGAGAAAAACACCTGGAAAGAGAATTGGGAAAGTAGAA  
GGGCTGAGCCTGGGACTGGCCTGGTTTAATTTCCCATCTCTTTGCGGGAAGAGAAGGGGCGTTGATG  
AGAAATTAAGGTTTTGAACGTTGACGATCAAAATTAAGTGGTGAATAAAGCCAGCGAGCGCGCAGAT

AGGAGCTGACGGAGAGAGAAGTGAGCACGCACCGCCCAAAGGTATGATTTTATAACAATTGCCGCCTG  
TGTGTGCTCACTCTCTTCTGTCAACTACGCTCAGCTTAACCTACAGGTTTCTTTCTGCTTTCCAATATAC  
ACAAATATACATATATACATATATATAGCTAATTAGTTACACCACCMAGTGCCATGGTCAGCCTAGCAG  
CTTTCCTTTCASTTGAGTCATATCACGTTTTTATTAGGGTTTTGAATTCGGAATGCTCYGTGAATGCCCTT  
ATCTACCAGGATAATTCATATGTATACGCGCGAATCTTTCAATTCATCAGGACTTGAGCAAGGGGGC  
CTGATTTCTGGTCTCCATTATTGATGGTGAAAGCCTGGTTGGTGGATAAAAGGACTGCCATCGATCCAT  
CCACATCTGAATCATGTCCCGACATTTAAGTACCAAAGTAATTTACTAGCACCCTAGCAATTASGTGT  
CCAATTTGTAGCAGTRCCAGTGCTTTGGAAAGAAAAGAGTAATTACATTTTTCACCTTCATATTTRAG  
TGCAATTACTACCTCTTACAATAACTTTTAAAAAC

**MdMIR156a6\***

GAGAGACAGACAGTAACACAGAGACGGAGAGAGAGAGAGGGGAGAGAGAGGGTTCGTAGATAGCA  
GCAGTACAGCTTATTTTGGTATTGGGGTTTGTGGAGGTTGTTCCATTTTTCTTCGTTTTGTCTTTATT  
TTCGCCATTGAGCGAAACCCTAAATTTATTTTACACCAAATAGTATTACTCGTAGATTTTTCTGACATT  
TTGGTATCTTTCCTTATATGGGTTTTTGTTTTTGTTTCTTCCTGGGTTCAGATCCGACTCTTTTCTATCA  
GTCTTTTTTACTTTTCTTGCTTTGCCGAACCAAGGAATCCCTTAGATATAATGCAAAATGGATCTTGCT  
CTATCRTGATCAGAGATTCTCTATGAACAATACGAATCGGAGTTCTGCTTTCTCACAAACTTTTTCTT  
CTTATTAATCAAAGAAATTGGCGATTGGGTAGTTATATTATTGTGGTGAGTGTAATTTGGTTGGGACT  
TAGGGTAGAAATTGACAGAAGAGAGTGAGCACACAGAGGCACTTGCCATAAAGCGTATGCCATTGCTT  
TTGCGTGCTCATGTCTCTTCTGTGCTTCCCATTTCCACTGCCGATTAATATTAAGTTGTTCAATTT  
TAATTTCTTCTCATCCCCATCCTTCTTCTGGTCTTCTCTTTAATTTGTTTACCAGTTCCCCTCTCTTCT  
CTCTCTCTCTCAAACCTTTAATTTATGGTGCTTAATTAAGTCTCAAAGGGAATTCAGACTTCAA  
GTAACCTGAATCCCTAAGCCTAGCGTAGCTAAGAGAGCATGCTCCTGTTACTCTTTTGAAATCGGTAAG  
TGATTATTTGTATTATATCAATTATTTTATGTTATCTTATCAGAAACTGGTGAAATGAGAGCGTGACTTTT  
GATAGTGTTTTATATATAAGAATGTGGATATATCTGTTTACTGTGCGGAATTAGCGGCAAAAACAGGTT  
ATCAAGCATAACATTATTACGGGACCATCATTCACGCTCTC

**MdMIR156a7**

TGGTATTGTACCAATTATGACAAGAGAGACCAAAATTCACCTGCCTACCAAATGGGGATAATTTTTCAT  
TGCTTCTGAATACGGACTTGAAGTCAGCAACAAATTTAATGCCTAATATAAAGGGATTTTCGATAGCAAT  
AAATAAAAAATAAAAAATAAAACCCTAAGAAACCCTAATCCCTAAACCCTACATAGTTTCGAGACCGAC  
ATGTCGAAATYGATAAATCTTTGTTACCACGACAACATGATGGAATTAATGATCCAGTCTAGATCCCCCA  
TAGACCCCGTCTGATCAGTAACTATTTTCTGGGAGTAAATATATCAAGCTTGATCAAGCTTGGTTAACA  
AATTTATAAGCAGAAAATTCAAGAAAAATCGTAAACGCAAATATACAAAACAAACATGATTCAGAGAG  
TGAGAGAGAGATAGGTGGGGGCGACAGATAGAGATTAAGCACGCAAAGCTTCGAGCATGAACCCAGC  
ATGCAARAAAATACCATGTGTGCTCACTCTCTTCTGTCAACCGCTTTTACCCTTTAAAACCTTCTCTTCA  
ATATTGCAGCACAGAGAGAGAGAGAGAGAAAGAGAGACCTCCAAAAAACCTAGCTGTTTATCCCCA  
GCCCCCAAATTTCTATGAGATTGGAACATTTGTTTTTTTTTTTTTTTTTTTTTTTGGAGGGTTTCAAACC  
CTARTCTTAGGTCGCTCTATTTCGACCTACCGGAAGGAACCCCAWTCTATCACTCTACTCACCCCTCGA  
TCYYWCACCGTTGAGGA

**MdMIR156a8**

TTTTAAAATATTAGCATGAAAATTATGTTAAAAACATAAGATGATGGAGCCTATGGATACTCCACTTTTG  
AGAGAGTTTCTTGCCTTTTTCTTTCCAAATAGTACTACTATAAATTCGACATGGAATTAAGTGGTAT

TAGTGAATTACTATTGGTACTGAGACGTCGGATGCAAGGACACGATTGAGATATGGATGGATGATGAGT  
CCTTATATCCACAAACCTGGCTTTCACCATTAATAATGGAGATCAGAAATCAACCGCCCTCCTTCCTCTG  
ATGAATTGAAGGACTCCGCGAGTGTATATAGTTAATAATCCTGGTAGATAGGGCATTTCGCACTGCATTCC  
AAATTCATAACCCTAATGAAAACATGATATTCCTTAAGTGGAGGAAAAGYTGCTAGGCTGACCATTGCA  
CTTGGTGTAACCTAATTAGCTATATATATATATATGTATGTATTAGAAAGAAAGAAGAGAGCTGTAGGTAA  
TTTGAGCGTAGTTGACAGAAGAGAGTGAGCACACACAGGCAGCAATTGTATAAAATCATACCCTGGG  
CGGTGCGTGCTCACCTCTCTCTCTGTCAGCTGCTATCTGCGCGCTCGCTGGCTTTATTTCCACTTAAT  
TTTGGTAGTCAACGTTCAAAAACCTTAATTTCTCATCAAAGCCCCCTTCTTTTCTGCAAAGGAACGGGA  
AATCAAACCAGGCCAGTCCCAGGCCCGCCTCCTTCTGCTCTCCCAATTCTCCTTCTCCAGGTGTCTT  
TCCCTCCACCGTATATWTATAYACACACACACACATATATATATGAAACAGATAGCTAGATACCCTCTT  
ACTCCAGCTCTTATTTTTCTGTGTTGGGAAATGGAGATGTTGTATGTATATTCATATATTTATAGATGTCT  
GTGTTGATCAGCGTATGTATTAATAAGACATAAGACATACAGTTTTGGGTTTGTCAATTGTTTTTATT  
ACCTGATCTTACTCACTCAAAGGTGTCTCCAGTTCATGATT

**MdMIR156a9**

TGGTATTGTACCAATTATGACAAGAGAGACCAAAAATTCACCTGCCTACCAAATGGGGATAATTTTTTCAT  
TGCTTCTGAATACGGACTTGAAGTCAGCAACAAATTTAATGCCTAATATAAAGGGATTTTCGATAGCAAT  
AAATAAAAAATAAAAAATAAAAACCTAAGAAACCTAATCCCTAAACCTACATAGTTCGAGACCGAC  
ATGTGCAAATYGATAAATCTTTGTTACCACGACAACATGATGGAATTAATGATCCAGTCTAGATCCCCCA  
TAGACCCCGTCTGATCAGTAACTATTTTCTGGGAGTAAATATTATCAAGCTTGATCAAGCTTGGTTAACA  
AATTTATAAGCAGAAAATTCAAGAAAAATCGTAAACGCAAATATACAAAACAAACATGATTCAGAGAG  
TGAGAGAGAGATAGGTGGGGGCGACAGATAGAGATTAAGCACGCAAAGCTTCGAGCATGAACCCAGC  
ATGCAARAAAATACCATGTGTGCTCACTCTCTTCTGTCAACCGCTTTTACCCTTTAAAACCTTCTCTCA  
ATATTGCAGCACAGAGAGAGAGAGAGAGAAAGAGAGAGGCCTCCAAAAAACCTAGCTGTTTATC  
CCCAGCCCCCAAAAATTTCTATGAGATTGGAACATTTTGTTTTTTTTTTTTTTTTTTTTTTTGGAGGGTT  
TCAAACCTARTCTCTAGGGTCGCTCTATTTCGACCTACCCGGGAAGGGAACCCCAATCTATCACTCTAC  
TCACCCTCGGATCCTCACCGTTGAGGRAACCCTAATAGCTTACCCTTGTTTTGCTTTGCTTTGCTTTGAT  
ATGAGAAATTGCAAGGCCTGTTGAGGCTTTATATAGAAGGAAAAAAGAGAAAAGAGAGGAGTAGCA  
GGAGTTGCATCGCGTATGGAATAAACTGGGTTTGYCKTCTATTGGTCATCGTCCATTATTTAATGCCAT  
TTAATTTTTAATCACAGATCGAAGAGAAAGGAAAAATAAAGTCGTCTAGAACTT

**MdMIR156a10**

ATTCTTTACAATTTTAAATTCATAAAAAATTAATAAAACAGGAAAAATTAATACATTAATAAACTTAT  
CTTGTATTTTCATTCTTTGTGATTGTGAAGTGCAGTGAGCCACGTATGGTATGGTACGTCGGTCAAATC  
ATAAACTGAAGGACACCTGTYACTGAGTAAGATCAGGATAATAAAAAACAATGACAAACCCAAAACCTC  
TATCATCAAGTCAAATGTCTTGATTTTAAACACCAGGAAGGAGAATTGGGAGAAAACCTCTGGAAGGA  
GAATTGGGAGAGCAGAAGGGGCGGGCCTGGGACTGGCCTGGTTTAATTTCCATTCTTTGCGGGA  
AGAGAAGGGGCGTTGATAAGAAATTAAGGCTTTGAACGTTGACGATCAAATTAAGTGGTGAATAAA  
AAGCCAGCGAGCGCGCAGATAGCAGCTGACAGAGAGAGAGGTGAGCACGCACCGCCCAAAGGTATG  
ATTTATACAATTGCTGCCTGTGTGTGCTCACTCTCTTCTGTCAACKACGCTCAGCTAACCTACAGTTC  
TCTTCTTCTTTCTAATATATACAAATATACATATATACAGCTAATTAGATACACCAAGTGAATGGTCA  
GCCTAGCAGCTTCTTCACTTAAGGAATATCATGTTTTTATTAGGGTTTTGAATTCGGAATGCTGCCCG  
AATGCCCTATCTACAGGATAATCACTATATACACAAGCGGAGTCTTTCAATTCATCAGACTTGAGGAA  
GGAGGGGGCTGATTTAGATCCCCATTATTAATGGTGAACCCGTGAAAGCCAGGTTGGTGTATATAA

GGACTCTCATCATCCATCCACATCTGAATCGTGTCCGTGCATTCGACGTCTAATTACCAATAGTAATTCA  
CTAATACCACTAGTAATTACGTGTTCAATTGTAGTAGTACTAGTGCTTTGGGAAGAAAAATGTYGGGAG  
ACTCAAAAGTTGGCTGTCCATAAGTTCCTTCATCCCATGTTTTTGTACATTAAC

#### **MdMIR156a11**

CGGACACCTGTACGTCCCGTTCTGCATGATAGAGAGAGAAAAAGAAAGGCAGGKAGGAGATAAGATC  
GTAAATAAGAGCAGTCAATGAAGAGAGAGAGACAGACAGTAACACAGAGACACAGAGAGAGAGAG  
AGGGTAGTACATAGCAGCAGTACAGCTTCTTTTGGTATTGGGGTTTGTGGAGGTTGTCCCTATTTTTT  
CTTCGTTTTGTCTTTCTTTTTTGGCATTGAGCGAAACCCTAAATTTATTTTACACAAAAATAGTATTACTC  
GTAGATTTTCTGACATTTTGGTACCTTTCCTTATATGGGTTTTTATTTTTCTTTCTTTCTGGGTTCTCAGA  
TCTGACTCGTTTCAATCAGTCTTTTTTACTTTTCTTGCTTTCAAGTTCTGCTTTCTTCACAAACTTTTTCT  
TTCTTATTAATCAAAAGAAATTGGCAATTGGGTAGTTATATTATTGTGGTGWGTGTTAATTTGGTTGGGA  
CTTAGGGTAGAAAT**TGACAGAAGAGAGTGAGCAC**AYAGAGGCACCTTGCCATAAAGCGTATGCCATTG  
CTTTTGGCGTGTCTATGTCTCTTTCTGTCAGCTTCCCATTTCCACYGCCGGATTAATTAAGTTSTTCAT  
TTTTTCTTCTCATCCCCATCCTTCTTCTGGTCTTCTCTTTAWTTTRTTTACCAGTTCCCTCTCTTCT  
CTCTCTCTCAAAATCTTTTATTTATGGTGCTTAATTAAGTCTCAAAAGGGGATTCCGACTTGAAWGTA  
AACTGAATCCCTAAGCCTAGCGTAGCTAAGAGAGCATGCTCCTGTTACTCTCTTGAAATCGGTAAGTGA  
TTATATGTATATTATATCAATTATTTTATGTTATCTTATCAGAACTGGTGAAATGAGAGCGTGACTTTTGA  
TATTGTTTTATATATAAGAAGKTGGATGTATCTGTTTACTGTGCGAAATTAGCGGCAAAAAACCAGGTTA  
TCAACGCATAGCATTAGTACGGGACCATTCATTACGCTCTCTGG

#### **MdMIR156a12\***

TTACTATAGTAAATCTTGAAAGAGGAAAAACAAGAAGCTAGGGCTAGAAGATTAGATCTGTGATACTG  
ATAAATGGTGATGAAACCTGAGACTCAGTTATTTATCAGTGGAACCTTGAGAGAATGGATGCACACTAGT  
STATACATACTGGATATCATCTTCCAAACGAGAAGAAGGGGCAWGGTCGGAGGGTCTGCCTGGGAAAA  
TGAAAATGCAATAATAATTGATTGAAAAAATAGATATAARGGGRATAAATAAATAAATTCATTCTTATC  
TTCTTGAAAGAATGAAAGAAAGAGTACACCTGGAAAGTGGAAGCTGASACGGTAGTAGGTAGMAGA  
ACTGAGAGAGAGATCGAGAGGAGGAACACAGAAAAGACATAATGAAAGGGAGGGCAGCGCAGGCGG  
TGGGCGGTGGGCGGYGGGCGGYGGGCGTGCGGCTGACAGAAAGAGAAGTGAGCACACATCACGCA  
AAGGTATGGCTTTATACAATTGCCCGAGT**GTGCTACTCTCTCTGTCA**ACCACCCTCGCTACTAGTCC  
AGTGATCTACTACTCTCCCTCATCCATTACCTTCTCTCTCTGCTCTGTCTCTCTCTCTATCTCTCTG  
TCTCTCTCTGCTACTTGGTCTTTATATTAGTATATTACACTACTTACAGCAGCTTTTTTTTCAATCTTCTAT  
TTATTGCCGACAACCTCATTATCTATATATCTTCTTCCCTCGACTAAAATAGATATGAAGATCTACTAACAC  
ACCATACTCCCCACTCTACTCTAGCTAAAGTTTCAATTTGTATAGAAGGACTCGTGACTCAACTCGTCA  
AGAGCATGTACCATCGAATATGAGGTCATGAATTCAAGTGTTTTTCTCTCTTGCTATCATTTTTTATTAGAAT  
TAAAAAGTAAAAATGTTTACCTTATGTAACCTTAGGCGCGTCTCTTTATATTGAACCAAAATAAAAAATTG  
GGTATCAGTAAGGATTACTATGTGTTTACTAATTCTCTGAGAATCAA AACACAAAC

#### **MdMIR156a13**

TTTGTGTCCACAGAGAAATTTCAACTTTTACGCTTACGGTATAAATTGCACCAATTAGGGCGAGAGAG  
CAATATTCACCTGGCTACCAAGTATAGATAAATACTTTTTTGGAAAACGGCCTTGAAGTCAGCAAAATTA  
TGATAAATTTAATGCCTAAAATTAAGGATTTTCGACAGCAAAAACTAAAAATAAAAAATAAAACCCT  
AGAAACCCTAATCACTAATCCGTACATAGTTTGGAGACCAACATGTCAAAATCAAATAAATCTCTGTGAC  
CACGACAACAATATGCAATGATCCAGTCTAGATTCCCCATCGATTAGGACTGATCAGTGGAATTTCTCT



GGGTGTAATTTATATGCAGAAATTTTCATGAAAAATTGTAAACAGGCAAAAATACAAAACAAACATGA  
TTCAGAGAGAGAGAGAGAGGTGGGTGGACAGATAGAGAGTAAGCACACAAAGCTTCAAGCATGAACCC  
AGCATGCAAGAAAATACCATGTGTGCTCACTCTCTCTGTCAACCGTCCCTTACCCTTTAATTATTTGAAC  
CTCCTTCATCGATATTGCACCAGATAGAGAGAGGGGCATCCAAAACCTTAGCTGTAAACCCCAAATG  
CTTTATGAGATTGGAACATTTATTTGCTTTTTTAGGGAGAGGATTTTGAACCCTAGATCTAGCTACTCCT  
ATCTATCGCTCTGTTCGACCTCACCGGAAGGGAACACCTATCTATCACTCTACTCACCTAGCTTGGT  
CCCTCACCGGTGAGGGAACCCTAATAGCTTAACTTTGATTTGCTTTGATATGAGAACTGCAAGGCCTG  
TTGGGGCTTTATATAGAAGGAAAAGGAGAGAAAAGAGAGGATTGCATCACGTATGGAATAAATGTGGG  
TTTATCTTCTATTGGTCATCTTCGATTATTTAATGCCATTTTAATTCTTAATCACAGATCGAAGAGAATGG  
AAAAAAAAGTCGTCTAGAACTTTATCTCTCCCATCCGATATGTTCAAACCCCAA

**MdMIR156a14**

CATACTATAGAGATAGAGCGTGAATAATGGTCCCATGATATGCTATATGCTTGATAACCTGGTTTTTGCCG  
CTAATTTCTCACAGTAAACAGGTATATGTACCTTCTCATATATAAAACAATATCAAAAGTCACGCTCTCA  
AGGTAATAGTTTCAGCTGCTTAGATAACATAAAAACAATTGATACAATATGCATATAATCACTTACCGAT  
TTCAAAGGAGTAACAGGAGCATGCTCTTAGCTAGGCTAGGCTTAGGGGTTTCAGTTTCTTTGAAGTT  
TGAATCCCTTGAGCAGTTAATTAAGCACCGTAAATAAAACATTTTGAAGAGAGAAGAGAAGGTTGAA  
ACAAATTAAGAGGGAGACGAGAAGAAGGGAGGGGGTGTGAAGGAAGAAATGAAAAAATTAATATT  
AATCCGGCAGTGGAATGGGGAAGCTGACAGAAAGAGACATGAGCACGCAAAAGCAATGGCATAACG  
CTTTATGGCAAGTGCCTCTGTGTGCTCACTCTCTCTGTCAATTTCTACCCTAAGTCCAACCAGATTA  
TTTCTAAACACAAGAATATATAACTACCAATACTGAATTTTGTATAATTAATAAGAAAAAAGATTG  
GGAAGAAAGCAGAAGTTGAAAGAGAGAGATAAATAAAAGATCGGTAGAAATGAGTCAGATCTGAG  
AACCCAGAAGGAGAGAATAAAATCCCATATAAGGAAAGATACCAAAATGTCGGAATAATCAACAAATA  
GTAATCTTTTGGTGTGAAGGAAATTTAGGGTTTTGTTCAATGATAAAAGTAAATAAAAGAGAGTTTGC  
CAAAAAAAGTAAATAAAAGAGAAGAAATATGAAAACAACCACCACAAACCCCAATAAGAAAA  
GAAGCTGTAAGTACTACTACTACTGCTGGCTATCTGCTACCCTTTCTTTCTCTCTCTGTGTGTCTGTGT  
TTCTGTATGTCTTTCTTCATTGACTCTCTTATTATGATCTTATCTCATCCTTGCCCTTC

**MdMIR156a15**

ACATATGGTATGGGATCATGGGAAAAGAWWAAAAAAGTGATAAAGTTCTAGATGACTTTTTTTCCATT  
CTCTTCGATCTGTGATTAAGAATTAATGGCATTAAAATATTTAAAATAATGAACGATGACCAATAGAAG  
ATATACCCACATTTATCCATACGTGATGCAACTCCTCTCTCTCTTTTTCTTCTATATAAAGCCCA  
ACAGGCCTTGCAATTTCTCATATCAAAGCAAAGCTATTAGGGTTTCTCAACGATGAGGGATCGAGGTT  
GCAGTAGAGTGATAGATAGGGTTCCCTTCCCGCGAGGTTCGAATAGAGGGATGGATAGGAGTAGCTAG  
ATGTAGGCTTGAAACCCCTCTCCCAAAAAGCAAATAAATGTTCCAATCTCATATATAGAGCATTGGG  
GGTTAAACAGCTAGGGTTTTGGGAGGCCTTTTCTCTCTGGTGCAATATCGAAGGAGGTTCAAATAATT  
AAAGGTAAAGGACGGTGACAGAAGAGAGTGAGCACACATGGTATTTTCTTGCATGCTGGGTTTCATG  
CTTGAAGCTTTGCGTGCTTACTCTCTATCTGTCACCATCACCTCCCTCTCTGAATCATGTTTGTTTTATAT  
ATTTGTGTTTACAATTTTTCATGAATTTTTTGCATATAAATTTACACCAGGAAATTGTTGAGAATAAGTC  
TCACATTAATGGGAGGAGAGACCTGAATAGGCTTATAAGAGGTTGAGCTACTCTCCATATGGTGGAAC  
CCCAACTTTCTTCATGGCATTAGAGCAAGTTGTCACACGTGTGAAGCCAAACGGTCACACGTGCTCCA  
AGTCACCCGTTGTGTTGTTACGTGTTAGGCTTGAAAATTTGCCACACATGAGAGGGTGTGTTGGGAA  
GGAGTCTTACATTTGATGAGAGGAGGACTTAGGTTCTAAGAGATTTGGCTACTTTTTATATTATCAATTG  
ATTTTATGATGGAACCAACTTTCTTAATTAGTTTTATGGTGGAACCTTT

**MdMIR156b1**

GGTCATTAAGTTAACCTTCCAACCCGCCCAACCCGTCCGAGTTGCATCCCTAGATAGTAATTCAGCTGT  
TATATATTTGAGGAAAGTAAAAAAGGGGGAAATTCTCAATCATGTTGTTGTTGTGCAATGACTGAAAG  
GACTGAAATAAGCAAACAAACCATGCGTACGGAAGCAAAAACATCACACACACACACATGTGTA  
AAACCTATATATGTATATATGTGTGTGTGTGTGTGTGTGTGTGTGTGTGTGTGTGTGTGTGTATGTATATTTAATTATTT  
CATGCTTTCCAAGATTTATCAATCGAGATGCACTCTATATGTTAGTACTACTTGTTCATCTCGGGAAGTT  
CAGACAGAATGGATAGACGATTAATATGGATTATAGAAAGGCATCATATGGCTATATAAAGGCAATAGGG  
AAGGTAAGGGGCTGAAGGTGTTGACAGAAGAATAGAGAGCACAAGGATGGAGATGCTGCCTTGT  
TTGCATTTCCCTCATCTGTGCTCTCTATCTTCTGTGACAAATTCACCTATGCCTCCTCCATCTACAAATAT  
ATATATATATATATATATATATATATATATATATAGCAACAAAACCTTAAAAATATTACAATAATTGCAAGG  
CAAATGAAAGATAATGGAAGAACTTAAAAGTTGAGACCCACAMACAATTTGGGTTGGGAGGGAGAG  
AGGGAGAGAGAGCTGACCTTGGGATGAACTTAAACGACTTCCAATGCCACTATTTATAGGGAAGGAGT  
AAGGTCTAAGCATGCATGCATGTTGGCATGTCTTATCATGCATGAAGCCGTTTTCTGTGAGATGCATAA  
ACGAATAAAATGTTCCCCAAATCACGATAATTGTGTGCGTTCCTGATGCCTCACGAAATCGGGTGTAG  
TAGTCAAATGATATGGATTCATTCCAAAAGTATTAATTATAATTAATCGTGGATATACCCCAAATTTGG  
GAATTAAGAGTGCTTGTGGCAATGACTAAAATTTCAA AATAATCTTC

**MdMIR156b2**

TGATAATAAGCGGCTGTGAAATAAATCAACAGAGTGTGATAAACTTTTTGTAAAAGTGCTTTAGGA  
AAAAAACAACAGTCTGATAGTGGGTCTTTTCATTAAGGAGCAATGTAGCTCCGTGTGCTTTGAAAA  
AAAACAGTTTTCCAAAGCTGCAAATAGCAGCTTCAGCATTTTCCTTTGATTTAGCTTATTCTCACAG  
CAGCTTCCAAAATAAGCCCYTTTTTTTTAGTTTACCAAACACCTAAAACCTTACAGCTTTTTTTCATG  
GGTGTTTTTTTTTAAGCACCTCACTCCCAAACCCCTAAGTTCATCCCAAGATCAGCTCTCTCTCC  
CTCTCTCCCTCCCAACCCAAATTGTCTTTGTGGCTCTCAACTTTTAAGTTCCTTTCATTATCTTTCATTG  
CTTGCAATAGTGGTAATATTTTTAAGTTTTGTTGCTATATATATATATATATATTTGTAGATGGAGGAGG  
ATAGGTGAATTTGTGACAGAAGATAGAGAGCACAGATGAGGAAATGCAAGAACAAGGCAGCATCTC  
CATCTTTGTGCTCTCTATTCTTCTGTCAACACCTCCAGCCCTTACCTTCCCTATTGCCTTTATATAGCC  
ATATGATGCCTTTCTATAATCCATATTAATCGTCTATCCATTCTATCTGAACTTCCTTCAAGATGAACAAGT  
AGTACTAACATATAGAGTGCATCTCGATTGATAAATCTTGGAAGCATGAAATAATTAATATACATACA  
CACACACACACACACACACACACACACACATATATACATATATAGGTTTTACACATGTGTGTGTGTG  
TGTGATGTTTTTGTCTCCGTACGCATGGTTTGTGTTGCTTATTTAGTCCTTTAGTCATTGCACAACAA  
CAACATGATTGAGAATTTCCCTTTTTTTACTTTCTCAAATATATAACAGCTGAATTACTATCTAGGGA  
TGCAACTCGGACGGGTTGGGCGGGTTGGAAGGTTAACTTAATGA

**MdMIR156b3**

AAGGAAGAATTATTTGAAAATTTAGTCATTGCCACAAGCACTTTTAATTCCCAAATTTGGGGTGTATA  
TCCACGATTAATTATAATTAATACTTTTGGAAATGAATCCATATCATTGACTACTACCCCGATTTGCGTG  
AGGCATCAGGAACGCACACAATTATCGTGATTTGGGGAACATTTTATTCGTTTATGCATCTCACAGAAA  
ACGGCTTCATGCATGATAAGACATGCCAACATGCATGCATGCTTAGACCTTACTCCTTCCCTATAAATAG  
TGGCATTGGAAGTCGTTAAGTTCATCCCAAGGTCAGCTCTCTCTCCCTCTCTCCCTCCCAACCCAAAT  
TGTCTKTGTGGGTCTCAACTTTTAAGTTCCTTCCATTATCTTTCAATTTGCCTTGAATTAGTTGTAATATTT  
TTAAGTTTTGTTGCATATATATTTTTATATATATATATATATATATATATTTGTAGATGGAGGAGGCATAGGTG  
AATTTGTGACAGAAGATAGAGAGCACAGATGAGGAAATGCAAAAACAAGGCAGCATCTCCATCCTT

TGTGCTCTCTATTCTTCTGTCAACACCTTCAGCCCCCTTACCTTCCCTATTGCCTTTATATAGCCATATGAT  
GCCTTTCTATAATCCATATTAATCGTCTATCCATTCTGTCTGAACTTCCGAGATGAACAAGTAGTACTAAC  
ATATAGAGTGCATCTCGATTGATAAATCTTGGAAGCATGAAATAATTAATATACRTATATAATCAAMA  
CACACACACACACAYATATATATATAYATACATATATAGTGTGTGATGTTTTTTTTGCTTCCGTACGCA  
TGGTTTGGTTGCTTATTTAGTCCTTTTCAGTCATTGCACAACAACAGCATGATTGAGAATTTCCCCCTTT  
TTTTACTTTCCCTCAAATATATAACGGCTGAATTCCTATCTAGGGGCCAACTCGGACGGGTTGGGCTGG  
TTGGAAGGTTAACTCAATCTTGACCTAACTTTTACAC

**MdMIR156b4**

TGATAATAAGCGGCTGTGAAATAAATCAACAGAGTGTGGATAAACTTTTTGTAAAAGTGCTTTAGGA  
AAAAAAAAAACAGTCTGATAGTGGGTCTTTTCATTAAGGAGCAATGTAGCTCCGTGTGCTTTGAAAA  
AAAACCAGTTTTCCAAAGCTGCAAATAGCAGCTTCAGCATTTCCTTTGATTTTAGCTTATTCTCACAG  
CAGCTTCCAAAATAAGCCYTTTTTTTTAGTTTACCAAACACCTAAAACCTTACAGCTTTTTTTCATG  
GGTGTCTTTTTTTTTAAGCACCTCACTCCCAAACCACCCCTAAGTTCATCCCAAGATCAGCTCTCTCTCC  
CTCTCTCCCTCCCAACCCAAATTGTCTTTGTGGCTCTCAACTTTTAAGTTCCTTTCATTATCTTTCATTG  
CTTGCAATTAGTGGTAATATTTTTAAGTTTTGTGCTATATATATATATATATTTGTAGATGGAGGAGGC  
ATAGGTGAATTTGCTGACAGAAGATAGAGAGCACAGATGAGGAAATGCAAGAACAAGGCAGCATCTC  
CATCTTTGTGCTCTCTATTCTTCTGTCAACACCTCCAGCCCCCTTACCTTCCCTATTGCCTTTATATAGCC  
ATATGATGCCTTTCTATAATCCATATTAATCGTCTATCCATTCTATCTGAACTTCCTTCAAGATGAACAAGT  
AGTACTAACATATAGAGTGCATCTCGATTGATAAATCTTGGAAGCATGAAATAATTAATATACATACA  
CACACACACACACACACACACACACACACATATATACATATATAGGTTTTACACATGTGTGTGTGTG  
TGTGATGTTTTTTGCTTCCGTACGCATGGTTTGTGCTTATTTAGTCCTTTTCAGTCATTGCACAACA  
CAACATGATTGAGAATTTCCCCCTTTTTTACTTTCCCTCAAATATATAACAGCTGAATTACTATCTAGGGA  
TGCAACTCGGACGGGTTGGGCGGGTTGGAAGGTTAACTTAATGA

**MdMIR156c1**

GGCTATATATAGAGGCAAGTTCCTTATGTTTAATTATTTATCTGTTAGCAAAAATTATGCTTATAATAATGAA  
TTAACGGATATTTAAATCATAATCTATRCAGAGTATGGTGTGTGAGTAGAAGAGGAGTTTCACGGCA  
CAAACGTTTGTCCCCGCAACTCATGGGCCAAAATCTGACTTCGAGACCGAAAGTTGYACTAWACCG  
GGTTTGTGCCATTAAATACCTCTTCTACAACCTGCGCCAGTATCTATAACATATGMATTTATATATATATAT  
ATATATATATRTATATATATRTATATGTATGTATGTATGTATGTAAGGGGTAGTASACATGCTAATATGCATTG  
TATACAATATATCAGATTTATATGAGCCTGAATGCGTTACCTCACCTATTAATTGATGGTTTGCWCTGCA  
GGGATGAATGCATGAGTTTTGTGGCATTAAAGGGTGTATAGATGAGATGGGGAATGAGGTTAGAGTTC  
ATATATGTTGACAGAAGAGAGAGAGCACAAACCCGCCATCGGCTAAGGAGAGTCTTTACCGTTGCTGGG  
AGTGTGCTTTCTCYTCYTCTGTCATCATCTCTTACATTCCCATCTGTCAGCACCGTCGCTGATCTACTT  
CGATCTAACCTCAAAGTAAGATATTCTCTCACAAAATTAAGGAACATTGTTATCTACAAATATATATATAT  
ATATATATATATATATATATATATATATATATATATATATATATATAGCTCTATTAACCTAAACATGGTAAATA  
CCAATATTAACCTCAACATAGTAAATACCAAAAATATATATGACAATATTTGAGAATTTCTTATATATTCAT  
TAATCTTCAAAGTGGAGTATATATAGGAGTTACAGTTGATATTACATATGTACTTCACCAATATGGGACAA  
TAAACTACTATTTACTTTAACTAATGTATAACTCGCAATACTCCCCCTCAAGTTGGTGCAAAGATGTC  
ACGCATGTCCAACCTTGCAAGCGAGTTGGA

**MdMIR156c2**

ATGTTGACAGAAGAGAGAGAGCACAAACCCGCCATCGGCTAAGGAGAGTCTTTACGTTGCTGGGAGTG

TGCTTTCTCTTCTTCTGTCATCATCTCTTACATTCCCATCTGTCAGCACCGTCGTCTGATCTACTTCGATC  
TAACCTCAAAGTAAGATATTCTCTCACAAAATTAAGGAACATTGTTATCTACAAATATATATATATATATAT  
ATATATATAGCTCTATTAACATAACATGGTAAATACCAATATTAACCTCAACATGGTAAATACCAAAAAT  
ATATATGACAATATTTAGGAATTTCTTATATATTCATTAATCTCCAAAGTAGAGTATATATAGGAGTTACAG  
TTGATATTACATATGTACTTCACCAATGTGGGACAATAAACTACTATTTACACTTTAACTAATGTATAACT  
CGCAACACTCCCTCTCAAGTTGGTGCAAAGATGTCACGCATGCCCAACTTGTCAAGCGAGTTGGAAA  
ACACACTATTAGACACAGCCTTAGTAAGAGCATCAACAAGTTGATCTTCAGATCTCACA

#### **MdMIR156c3**

AGTTAAAGTGAGATATTAGAGACAGCCAACAATTTTCGTAGAATTCAGTAGGAGAGGAAAGCAAGGAA  
CCAGCTGACAGTGAAAGAAGTGTGTGAGTTATATATTAGTTAGAGTGTAATAGTAGTTTATTGTCCC  
ACATTGGTGAAGTACATATGTAATATCAATTGTAACCTCTATATACACTCCACTTTGGAGATTAATGAATA  
TATAAGAAATCCCTAAATATTGTCATATWTATTTTGGTATTTACCATGTTWAGTTAATAKTGSTTTAKTT  
ATWTAYTWWRITTTAKTTTAATAKAKMTATATATATATATATATATATATATATATATTTGTAGATAACAATGTTCC  
TTAATTTTGTGAGAGAATATCTTACTTTGAGGTTAGATCGAAGTAGATCAGACGACGGTGCTGACAGAT  
GGGAATGTAAGAGATGATGACAGAAGAAGAGAAAAGCACACTCCAGCAACGTAAAGACTCTCCTTAG  
CCGATGGCGGGTTGTGCTCTCTCTTTCTGTCACATATATGAACCTCAACCTCATTCCCATCTCATCTA  
TACACCCTTAATGCCACAAAACCTCATGCAATCATCCCTGCAGWGCAAACCATCAATTAATAGGGTGAG  
GTAACGCATTCAGGCTCATATAAATCTGATATATTGTATACAATGCATATTAGCATGTSTACTACCCCTTAC  
ATACATACATACATAYAYATATATATAYATATATATATATATATATAKCATATRTATASATACTGCKCAK  
WTGTAKAARWRSTATYTAATGGCACAAACCCGGTWTAGTRCAACTTTCGGTCTCGAAGTCAGATTTTG  
GCCCATGAGTTGCGGGGACAAACAGTTTGTGCCGTGAAACTCCTCTTCTACTCACACACCATACTCT  
GYATAGATATATGATTTTAAATATCCGTTAATTCATTATTATAAGCATAATTTTTGCTAACAGATAAAATAAT  
AAACATAAGAACTTGCCTCTATATATAGCCAAAATTAAC

#### **MdMIR156c4**

GAAAGTAAAAAAGTTGGAGAAACACAATTAATAAATAAATTACTTGTATAAATATTACAACACACACA  
TAATATTGCAAACATAAAGAGACAGACGCTATTAGAAGCTGTCGACCTAACATAAAAAACCRCCATAAT  
CTTGCTAGAATTGTCTAGCATAGTTWACATATATGCATGCACCGGCCACTTCCATTGCTTGCTAGAGTTC  
TCTAGCAAAATCTCTGCATGTTTGAAC TAGAAAAATCTGTAGTTTCTGCACCTGACCAAAATGCAGTCT  
ACAGAAGCTACTGACTTTGGGCGYGGTGTGATCTTTCAACAGGGAAGACATGCTWATATGCGTTTGA  
CACATTTTATGAGATTTATATGATYMTGAATGCATTATCTCATTACATCTAAAGCCTGGCTATTAAGTAT  
GGCTAACTTGCATGACAGGATGAATGCATGAGTTGTGGCATCGAGGGTGGTGGATGTGATGGGGATG  
AGGTTAGAGATCATGTTGACAGAAGAGAGAGAGCAACCCRCCATCGGCTAAAGAGAGTCTTTTCC  
GTTGTTGGGAGTGTGCTCTCTTTTCTTCTGTCATCATCTCCTACATTCCCCTCTCTCAGCACYGCTGAT  
CTCTGTGCTATATARCCTSAAGTAATTAAGGTATTCTCTCACCAGGGACWTTGTTACATACAAATTTA  
TAGTTCAACATTATATACAGCTAATAAGGAAATCACTTAATTTGTGGATCYTGTGTGTTTGTGTGTGATG  
TATTACTTGTGTGCAAAACYGGGAAATTTCTTACGCAGATGATTCTTGTWGCAGCGGTAATTAACCA  
GCYGAATMTTTTTTGGAGGAATAAATTTTACGAATATTTTGCAGCTCTTGATCAAATATTTATTWTGG  
TCAACTTATAAGCGACGCTGGTTTACTACTAATCTTGGTTTCTACTTGTACAACATTCAAATGTTATTTCG  
GAAACTTGATCGGTGTTGTAAACCGTGACAGCTTAGTGATCGACATAGTTT

#### **MdMIR156d1**

AGGAAGAATTATTTTGAATAATTTAGTCATTGCCACAAGCACTTTTAATTCCCAAATTTGGGTGTATAT

CCACGATTAATTATAATTAATACTTTTGGGAATGAATCCATATCATTGACTACTACACCCGATTTGCGTGA  
GGCATCAGGAACGCACACAATTATCGTGATTTGGGGAACATTTTATTCGTTTATGCATCTCACAGAAAA  
CGGCTTCATGCATGATAAGACATGCCAACATGCATGCATGCTTAGACCTTACTCCTTCCCTATAAATAGT  
GGCATTGGAAGTCGTTTAAAGTTCATCCCAAGGTCAGCTCTCTCCTCTCTCCTTCCCAACCCAAATT  
GTCTKTGTGGGTCTCAACTTTTAAAGTTCCTTCCATTATCTTTCATTTGCCTTGCAATTAGTTGTAATATTT  
TAAGTTTTGTTGCATATATATTTTTATATATATATATATATATATATATTTGTAGATGGAGGAGGCATAGGTG  
AATTTGCTGACAGAAGATAGAGAGCACAGATGAGGAAATGCAAAAACAAGGCAGCATCTCCATCCTT  
TGTGCTCTTATTCTTCTGTCAACACCTTCAGCCCCCTACCTTCCCTATTGCCTTTATATAGCCATATGAT  
GCCTTTCTATAATCCATATTAATCGTCTATCCATTCTGTCTGAACTTCCGAGATGAACAAGTAGTACTAAC  
ATATAGAGTGCATCTCGATTGATAAATCTTGAAAGCATGAAATAATTAATATACRTATATAATCAAMA  
CACACACACACACAYATATATATATAYATACATATATAGTGTGTGATGTTTTTTTTGCTTCCGTACGCA  
TGGTTTGTGCTTATTTAGTCCTTTTCAGTCATTGCACAACAACAGCATGATTGAGAATTTCCCCCTTT  
TTTTACTTCCCTCAAATATAACGGCTGAATTCCTATCTAGGGGCCAACTCGGACGGGTTGGGCTGG  
TTGGAAGGTTAACTCAATCTTGACCTAACTTTTACAC

**MdMIR156d2**

GATAATAAGCGGCTGTGAAATAAATCAACAGAGTGTTTGATAAACTTTTTGTAAAAGTGCTTTAGGAA  
AAAAAAAACAGTCTGATAGTGGGTCTTTTCATTAAGGAGCAATGTAGCTCCGTGTGCTTTGAAAAA  
AAACCAGTTTTCCAAAGCTGCAAATAGCAGCTTCAGCATTTCCCTTTGATTTTAGCTTATTCTCACAGC  
AGCTTCCAAAATAAGCCYTTTTTTTTAGTTTACCAAACACCTAAAACCTTCACAGCTTTTTTTCATGG  
GTGCTTTTTTTTTAAGCACCTCACTCCCAAACCACCCTAAGTTTCATCCCAAGATCAGCTCTCTCTCCC  
TCTCTCCCTCCCAACCCAAATTGTCTTTGTGGCTCTCAACTTTTAAAGTTCCTTTCATTATCTTTCATTGCC  
TTGCAATTAGTGGTAATTTTTAAAGTTTTGTGCTATATATATATATATATTTGTAGATGGAGGAGGCAT  
AGGTGAATTTGCTGACAGAAGATAGAGAGCACAGATGAGGAAATGCAAGAACAAGGCAGCATCTCCA  
TCCTTTGTGCTCTTATTCTTCTGTCAACACCTCCAGCCCCCTACCTTCCCTATTGCCTTTATATAGCCAT  
ATGATGCCTTTCTATAATCCATATTAATCGTCTATCCATTCTATCTGAACTTCCTTCAAGATGAACAAGTA  
GTACTAACATATAGAGTGCATCTCGATTGATAAATCTTGAAAGCATGAAATAATTAATATACATACAC  
ACACACACACACACACACACACACACATATATACATATATAGGTTTTACACATGTGTGTGTGTGT  
GTGATGTTTTTTGCTTCCGTACGCATGGTTTGTGCTTATTTAGTCCTTTTCAGTCATTGCACAACAAC  
AACATGATTGAGAATTTCCCCCTTTTTTACTTTCCTCAAATATATAACAGCTGAATTACTATCTAGGGAT  
GCAACTCGGACGGGTTGGGCGGGTTGGAAGGTTAACTTAATGA

**MdMIR156d3**

GGTCATTAAGTTAACCTTCCAACCCGCCAACCCGTCCGAGTTGCATCCCTAGATAGTAATTCAGCTGT  
TATATATTTGAGGAAAGTAAAAAAGGGGGAAATTCTCAATCATGTTGTTGTTGTGCAATGACTGAAAG  
GACTGAAATAAGCAAACAAACCATGCGTACGGAAGCAAAAACATCACACACACACACATGTGTA  
AAACCTATATATGTATATATGTGTGTGTGTGTGTGTGTGTGTGTGTGTGTGTATGTATATTTAATTATTT  
CATGCTTTCCAAGATTTATCAATCGAGATGCACTCTATATGTTAGTACTACTTGTTCATCTCGGGAAGTT  
CAGACAGAATGGATAGACGATTAATATGGATTATAGAAAGGCATCATATGGCTATATAAAGGCAATAGGG  
AAGGTAAGGGGCTGAAGGTGTTGACAGAAGAATAGAGAGCACAAAGGATGGAGATGCTGCCTTGTTT  
TTGCATTTCCCTCATCTGTGCTCTATCTTCTGTCAACACCTCCAGCCCCCTACCTTCCCTATTGCCTTTATATAGCCAT  
ATATATATATATATATATATATATATATATATATAGCAACAAAACCTAAAAATATTACAATAATTGCAAGG  
CAAATGAAAGATAATGGAAGAACCTAAAAGTTGAGACCCACAMACAATTTGGGTTGGGAGGGAGAG  
AGGGAGAGAGAGCTGACCTTGGGATGAACTTAAACGACTTCCAATGCCACTATTTATAGGGAAGGAGT

AAGGTCTAAGCATGCATGCATGTTGGCATGTCTTATCATGCATGAAGCCGTTTTCTGTGAGATGCATAA  
ACGAATAAAATGTTCCCCAAATCACGATAATTGTGTGCGTTCCTGATGCCTCACGCAAATCGGGTGTAG  
TAGTCAAATGATATGGATTCATCCAAAAGTATTAATTATAATTAATCGTGGATACACCCAAAATTTGG  
GAATTAAGAGTGTGTTGGCAATGACTAAAATTTTCAA AATAATTCTT

**MdMIR156d4**

GATAATAAGCGGCTGTGAAATAAATCAACAGAGTGTGATAAACTTTTTGTAAAAGTGCTTTAGGAA  
AAAAAAAACAGTCTGATAGTGGGTCTTTTCATTAAGGAGCAATGTAGCTCCGTGTGCTTTGAAAAA  
AAACCAGTTTTCCAAAGCTGCAAATAGCAGCTTCAGCATTTCCTTTGATTTTAGCTTATTCTCACAGC  
AGCTTCCAAAATAAGCCYTTTTTTTTAGTTTACCAAACACCTAAAACCTTCACAGCTTTTTTTCATGG  
GTGCTTTTTTTTTAAGCACCTCACTCCCAAACCACCCTAAGTTCATCCCAAGATCAGCTCTCTCTCCC  
TCTCTCCCTCCCAACCCAAATTGTCTTTGTGGCTCTCAACTTTAAGTTCCTTCATTATCTTTCATTGCC  
TTGCAATTAGTGGTAATATTTTAAGTTTTGTTGCTATATATATATATATATATTTGTAGATGGAGGAGGCAT  
AGGTGAATTTGCTGACAGAAGATAGAGAGCACAGATGAGGAAATGCAAGAACAAGGCAGCATCTCCA  
TCCTTTGTGCTCTCTATTCTTCTGTCAACACCTCCAGCCCCTTACCTTCCCTATTGCCTTTATATAGCCAT  
ATGATGCCTTTCTATAATCCATATTAATCGTCTATCCATTCTATCTGAACTTCCTTCAAGATGAACAAGTA  
GTACTAACATATAGAGTGCATCTCGATTGATAAATCTTGAAAGCATGAAATAATTAATATACATACAC  
ACACACACACACACACACACACACACACATATATACATATATAGGTTTTACACATGTGTGTGTGTGT  
GTGATGTTTTTTGCTTCCGTACGCATGGTTTGTGCTTATTTTCAGTCCTTTCAGTCATTGCACAACAAC  
AACATGATTGAGAATTTCCCCCTTTTTTACTTTCCTCAAATATATAACAGCTGAATTACTATCTAGGGAT  
GCAACTCGGACGGGTGGGCGGGTTGGAAGGTTAACTTAATGA

**MdMIR156e1**

AGTACCCTTGTGACCGAGTTGCTAAAACCTAGGATTATGTGTATCTGCCTTTTTTAATAGGAACTTTAACG  
AAAAACTTCAGGTACTGTTTACTTTAATAAAAAACCATATTTTTTACGTAAAAAGTCAATCATGGTACTA  
TTCCTTTACCTTTTATTTTGTCAATTATCAATAAAACTCAAATTTTCAAACCTTTTTCAATTAGTTTTTTTT  
TTAATCTTTTCCAAGAAGAATATTTTTGCTTGCCATCTTATTTATTTATAAATTTAAATTTAAGATATAT  
GTAATCAAGACATAAATTTAAATTTAAATTTATTTATAGAATAGTGAATATTACTAGAGTGTCTCTC  
CTATAAATAGGGACCATTGGTGGAGGTCTGTTGAAGTATCTTCTATGTCTGCAACTCTATTATTTAAACA  
TTATTATAATATTAATTTAGGGTAAGGAGTGGGGAACCTGGGAGAGAGAAAGAGCAGGGAGTGATGAT  
ACATTGTTGACAGAAGATAGAGAGCACAGATGGATGACTTGCAATTGACTATGCATCTCACTCCTTTGT  
GCTCTCTATGCTTCTGTCACTACCTCGTTATATCTAGCTTCCCTTGCCTCTCTCCACACCCGTGCACCTCC  
CATATTAATCTAATTTACTAGTTAATCAGCTGATATATGCTTCCCTTTCAAATTGCTTATATATTGTTTAGATT  
TTGTAATTTCAAGTATTAATCTGAACTGATTTTGGGTATATATTCATCAATTTATTGATTTCTCAATTTTGA  
TCTGACTTGATATATAGTTGGATTTTCCCTTTTCCCTCTTTTGTAGGATCTTATGTTTTACAGGTTTGATG  
AAGTAGTAGTACTGGGCAAGCAGATCTATCAGAGCCGCAGGAACACAGGTTCTTATAAACATATTTATA  
AGTATATACACATATATATGTGTGTGTGATTTTATGGGGTTTGTTCATGCGTAAGTTTGTTTATTAGTTT  
TCAATCGTCAATGTGTAGTTTCATGATCGCA

**MdMIR156e2**

TACAGACACATATTATTTATAATTTATAAGAACCTATGATTGCAAAGTACTCCTGCGGCTCTGATAGAT  
CTGCTTTTCCAGTACTACTACTTCAATCAAACCTGTAAAACATAAGATCCTACAAARGAGAAAAA  
GGGAAATCCAATTATATATACAAGTCAGATCCAAAATGAGAAATCAGTAAATTTATGAATATACCCAAA  
TCACTCGAGACTAAATATGAAATTACAAAGTTAAAACAATATATATGCAAGCAAAGGAAGCATATATATA

TGCAAGCAARGGAAGCATATATAATCGATTAATTAGTAATCAATCAAATAATCATTTTTATGAATTAGATTA  
ATATGGGAGGTGCAGGGGTGTGGGGGAGGGGCAGGGAAGCTGGATATAGCTAGGTGATGACAGAAGC  
ATAGAGAGCACAAAGGAGTGAGATGCATAGTCCATTGCAAGTCATCCATCTGTGCTCTCTATCTTCTGT  
CAACAACGTATCACCACTCCCTGCTCTTTCTCTCTCCAGTTCCTAGTCCTTACCCTAAATTTAATACT  
ATAATATGATTAGAGATTGGAGAGTTGCAGCTATAGCAGATACTTTAAGAGACCTCCACCAATGGTCCTT  
ATTTATAGGAGAAAAAGTAGCACCCGCCACTGAAAAAAGAATGGTAAAAGGTAGATGCAAGTACTC  
CTGGGTTTCTCAACTCAGTCACACGGTTACTATAGTACTACGAGTGATTTTTCCAATAGGTCTAAGATAT  
TGTTATTTGCAAATTAGTATCACGATTTAATAATATTTTTTTATTTGTAAATTAATAAATTTTAGATTTGAA  
ATTTGTGAAAGATTAGTCGATATCAATTTATAGATCTCATACCTTAGTGTAATATATTATTGTATTAATAA  
AATAAATAACCTTGCAAAGGATAATAAATTTCTCTTTGTGGCAGAAAAGAAAATAAACACCACCA  
CGCAAAGTTATTCTCTTTGATTTATAGGACGTATATTTATT

#### **MdMIR156f1**

GTGGACTCGGCGGATTCCGGTAAGCCGTCGACGGCGGGGAGAGGAAGCTCGATGAAATCGATAAGAG  
GGGAAAAGGAGGAGGATCGGAAGCGATTGATGATACTTAAATCCTAAAATGCAAGAGATTATCCAATA  
AGCTACCAACTATCATCTTTAAAAATAAAAATACAAATAAAACGTACCGAGCGAAAATTTTCTAATG  
CCAGAATTAATAATGGACTTATCCAAAATACCTACCAAACCCACTAAATTTTATTTAATTTTTTAATATC  
AATTATTGACATACATGATTTGGGGTGCTTATTGGATAATCTCTTGCAATTTAGGATTTAAGTATCATATCT  
TGCTCTGACAAGTCAAACGATAGTGTGTGTGTATCATCTTATATGTAGTTGAGAGAGAGTAGTGAGA  
GAGAGGGTTAAGGATGGTAGGTGACAGATAGAGAATGAACACATAGAGCTTCTGACATGGATTCATGC  
AAGAAAAGAACCACGTGTGCTACTTTCTTCTGTCACTTTCTTCCAAACCTGTAATTTCTGTATCCGAA  
TTATATGTATCCGGTCGTACATGTAGCCACGCATGCATGTTGAACTAAATGAAACACGTACCTTCTTCGT  
CCTCTTCTTTGTAGCTAGGTTAATTAAGGARGCTGATTTGTGCAAAACAAAGG

#### **MdMIR156f2**

GGGCACATGAAATTACTCTGGAGTAAGTTCTAACCTTTTTCGTACCTTAATTTTCGTATTAATGATWTATT  
CGACGAGGTATTAATAAATACCACAAAATAAARAATTAGTTTAGGCTTTTTAGCCAAAAGRRTCTCCGA  
GATTGGCATAAASACAYAAGTGTTAGACGTAAGCAAGAACCGAAGGTTGACTAGTTGGCCTGGAATC  
TCTTGCATTTCAAGACAAGTGATTGGTTGCCGGTTTTCCAATAGCATTCAAGGGGAAGAAAATTTAACAT  
ATCTTTACCAAGGAGTCAAGGACGGGTGCGATGCTTCTGATCCCCTATATAAATTAACCCTCCTAACCTT  
TGTTTTGCACAAATCAGCTTCTTAATTAACCCTAGCTACAAGAGAAGGACGAAGAAGGTACGTGT  
TTCATTTAGTTCAACATGCATGCGTGGCTACATGTACGACCGGATACATATAATTCGGATACAGAATTAC  
AGGTTTGKAAAGAAGGTGACAGAAGAAAGTGAGCACACGTGGTTCTTTTCTTGCATGAATCCATGTC  
AGAAGCTCTATGTGTTTCTTCTATCTGTACCTACCATCCTTAACCCTCTCTCTCACTACTCTCTCTCT  
CAACTACATATAAGATGATACACACACACACACTATCGTTTTGATTTGTCAGAACAAGATATGATACTT  
AAATCCTAAAATGCAAGAGATTATCCAATAAGCACCCCAATCATGTATGTCAATAATTGTGCACCCCA  
AATCATGTATGTCAATAATTGATATTAATAAATAAATAAATTTAGTGGGTTTGGTGAGGTATTTTGA  
TAAGTCCATTTTAATTTCTGGCATTAGAAAATAATTTTCGCTCGGTACGTTTTATTGTATTTTTTAA  
AGATGATCAATTTGGTAGCTTCGCCACGACAGTTCATCTTCGGAACATAGGAAGACTCATAGAGGCAT  
TGCAGTCTTTCTGACCATATAAGCACTAATCTCATACT  
TTAGTTTAAT

## 2. Predicted secondary structures of the apple precursor miR156s.

We analyzed RNA secondary structure of the candidate sequences (<http://mfold.rna.albany.edu/>). The positions of the mature miR156 embedded were marked with highlighted yellow color fonts.

MdMIR156a1

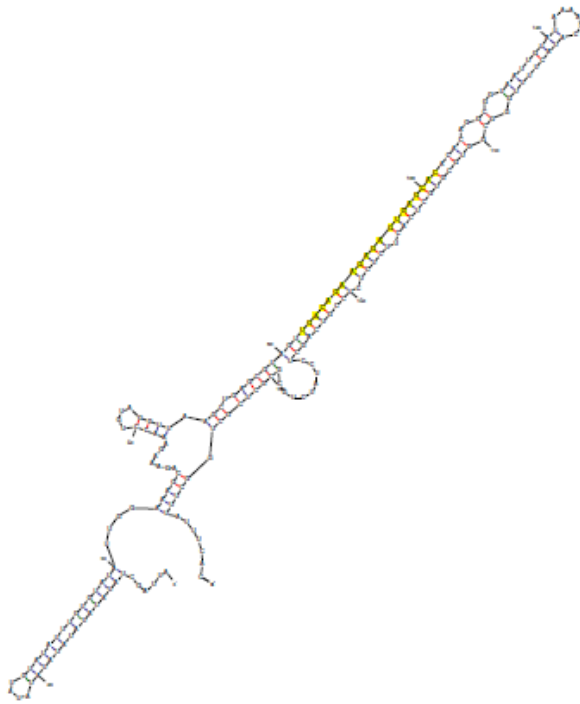

MdMIR156a2

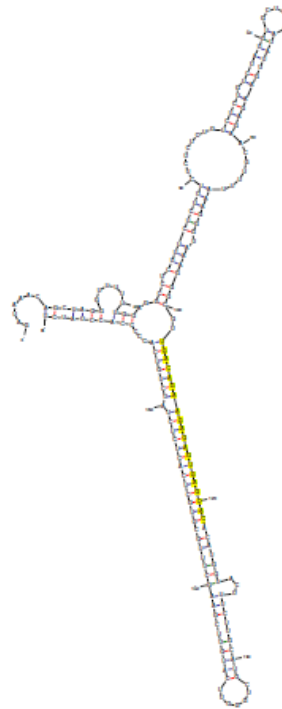

MdMIR156a3

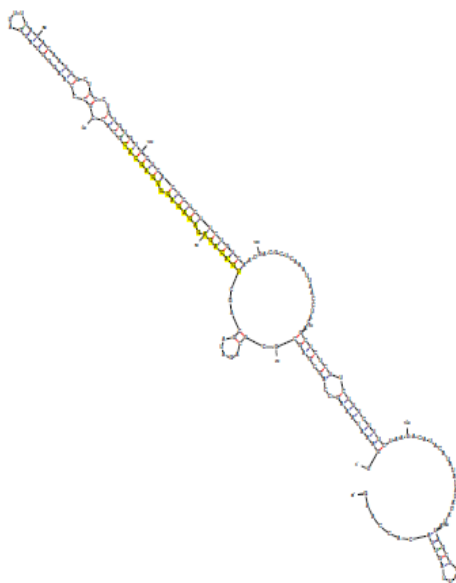

MdMIR156a4

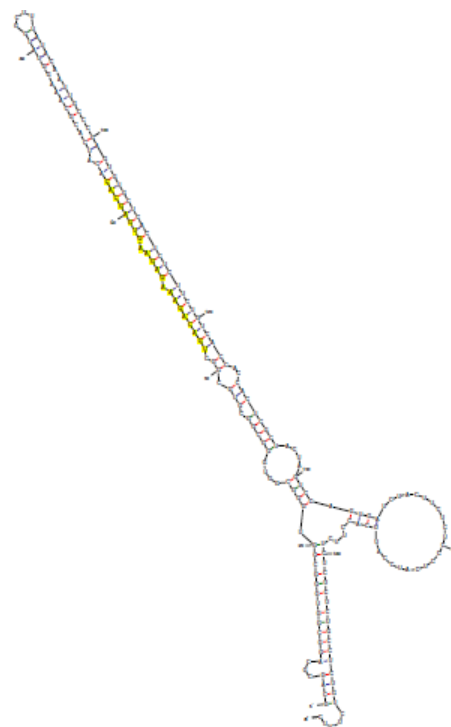



MdMIR156a5

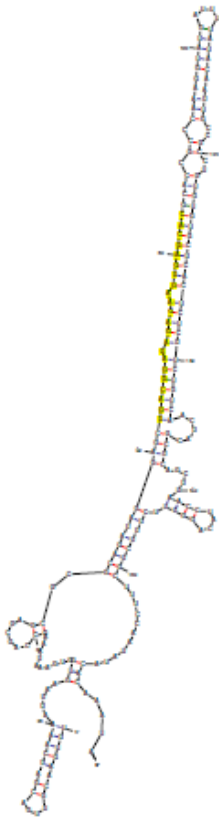

MdMIR156a6

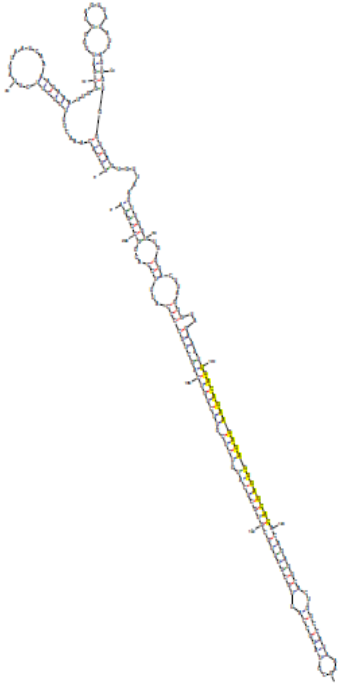

MdMIR156a7

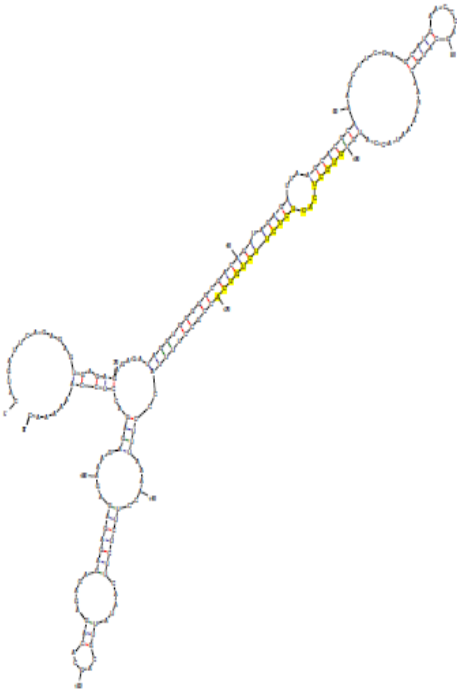

MdMIR156a8

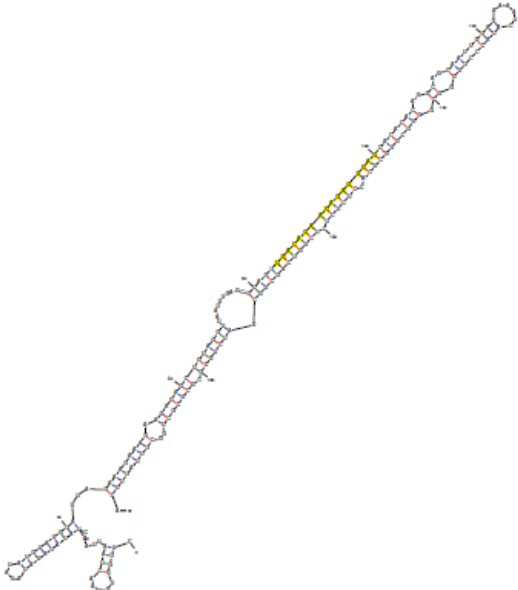

MdMIR156a9

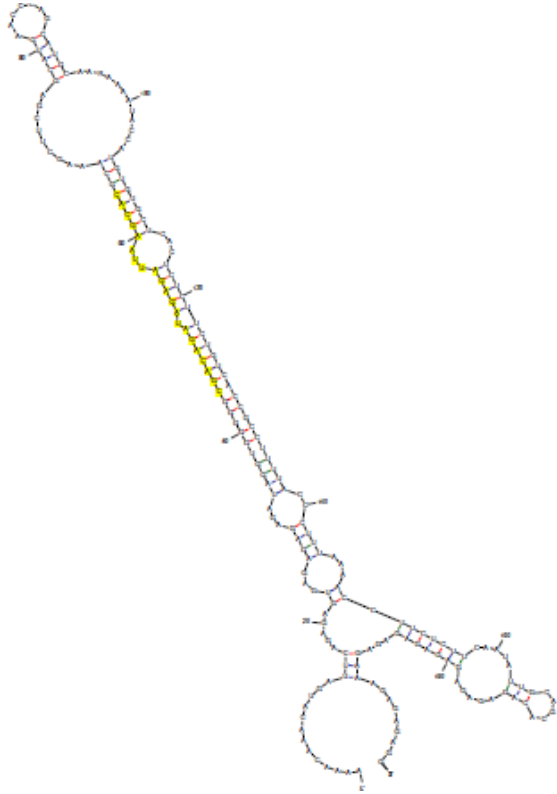

MdMIR156a10

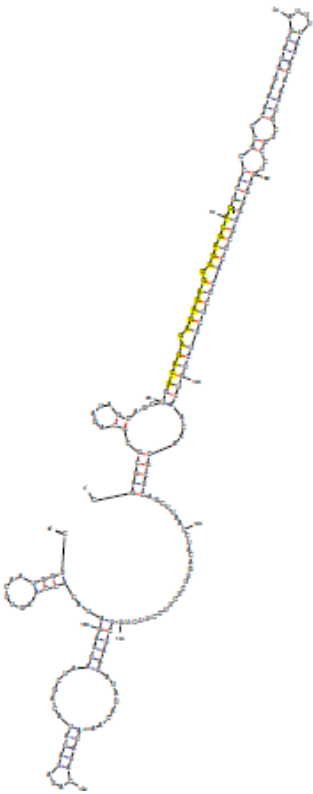

MdMIR156a11

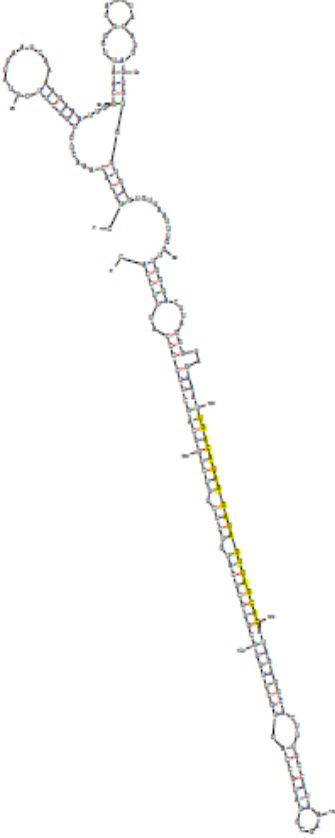

MdMIR156a12

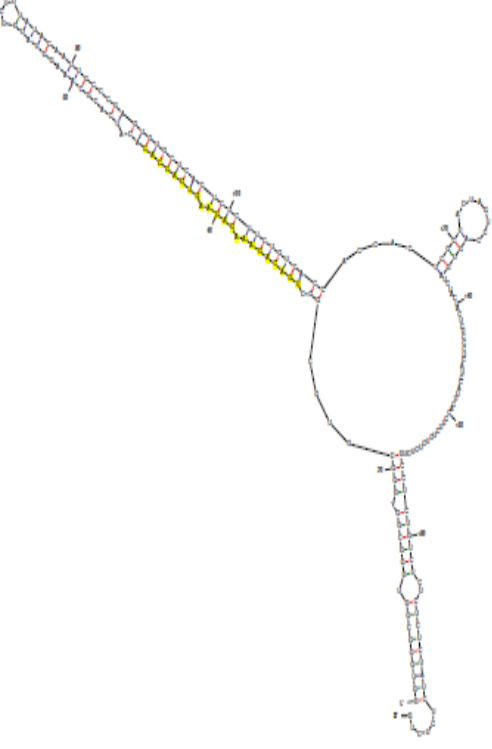

MdMIR156a13

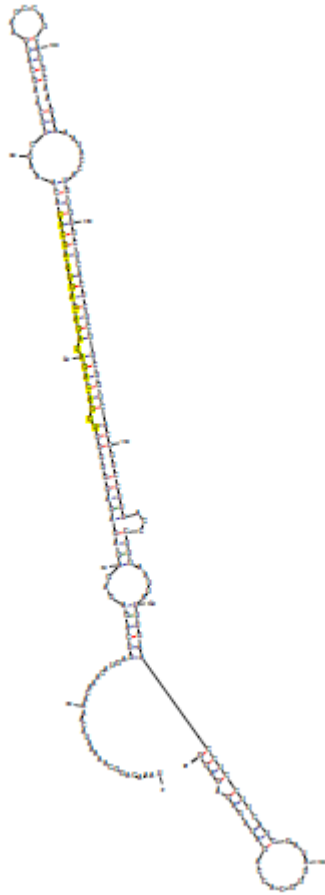

MdMIR156a14

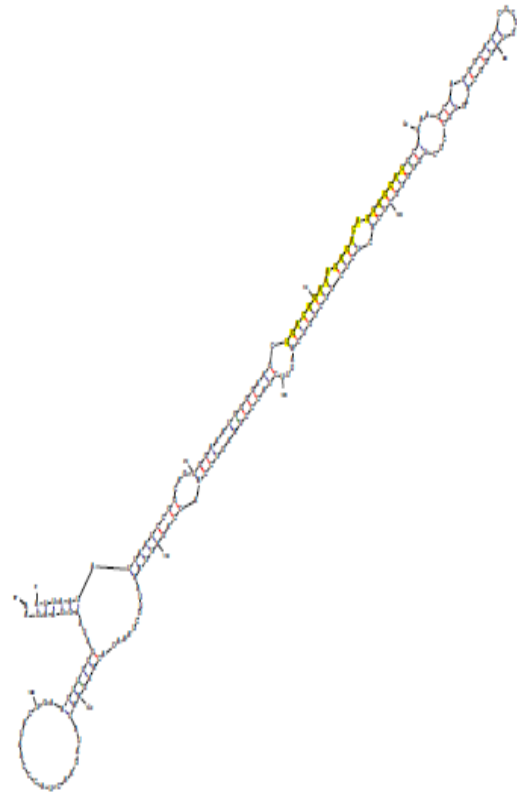

MdMIR156a15

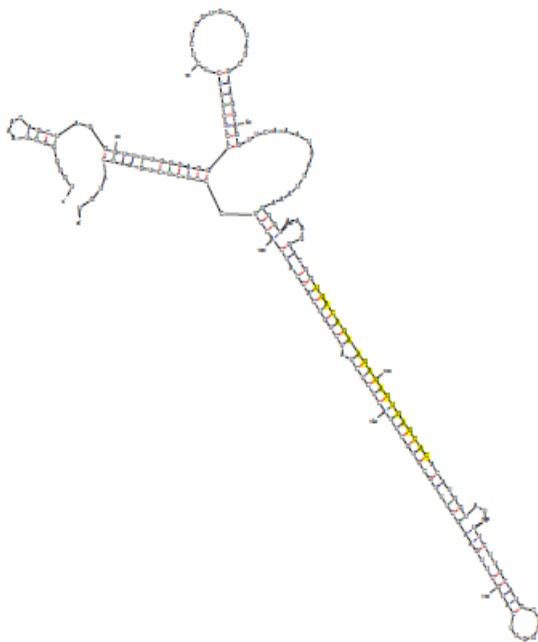

MdMIR156b1

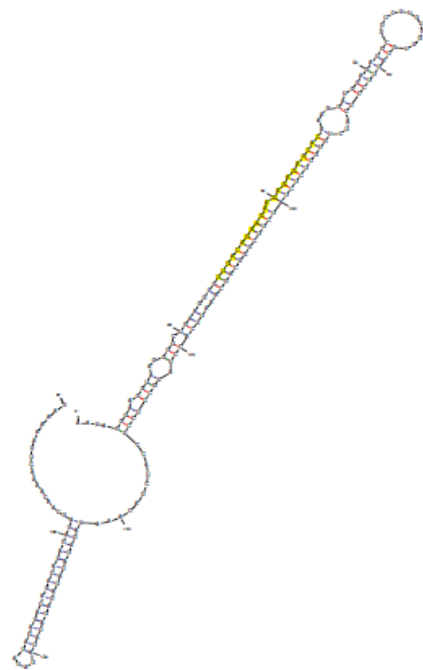

MdMIR156b2

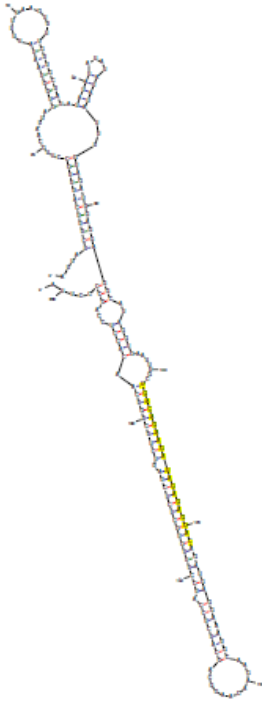

MdMIR156b3

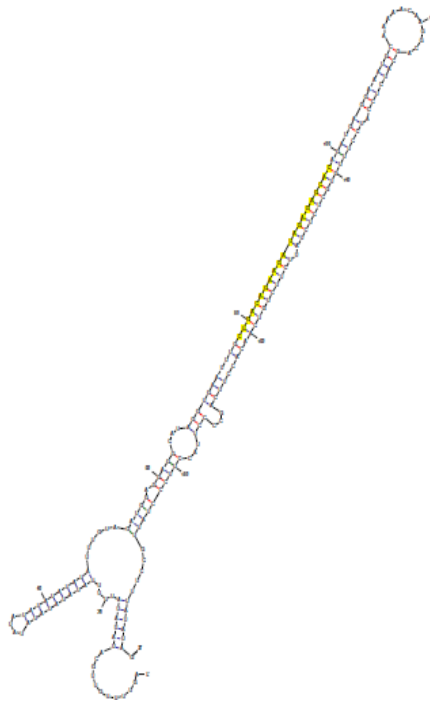

MdMIR156b4

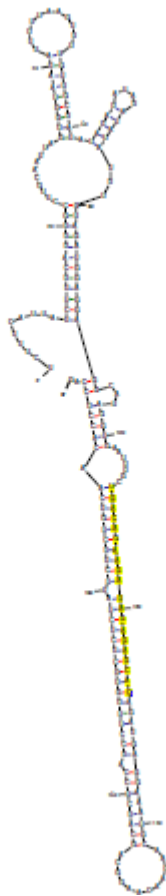

MdMIR156c1

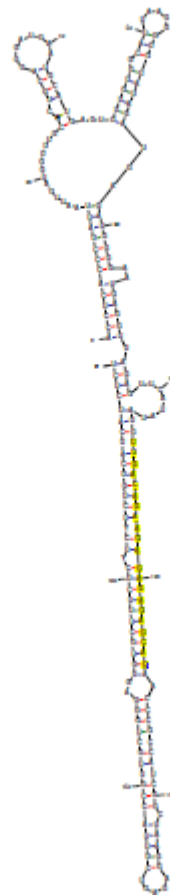

MdMIR156c2

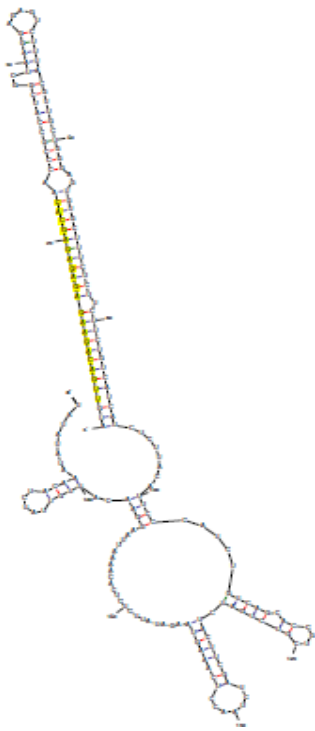

MdMIR156c3

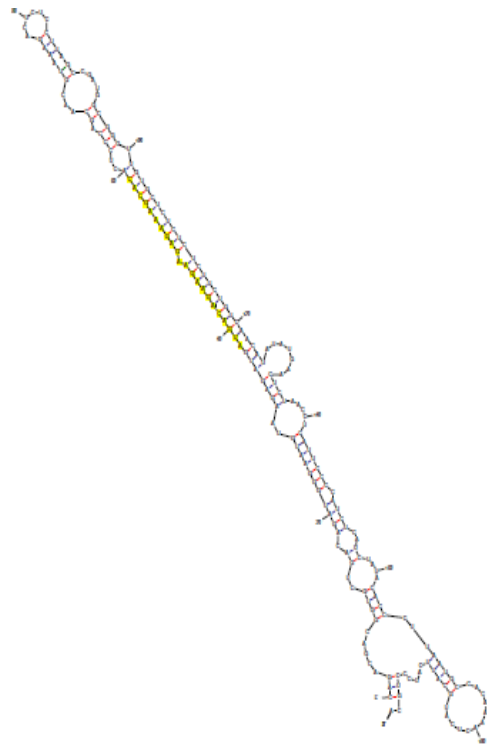

MdMIR156c4

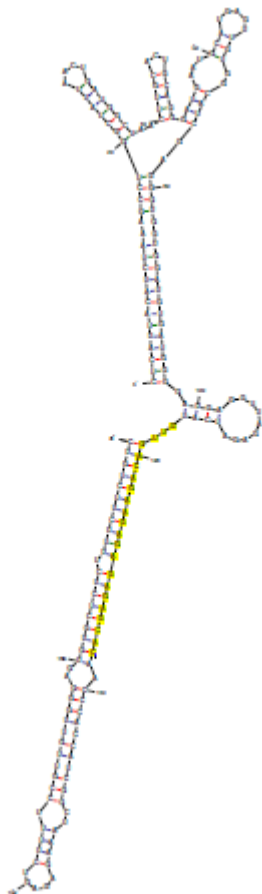

MdMIR156d1

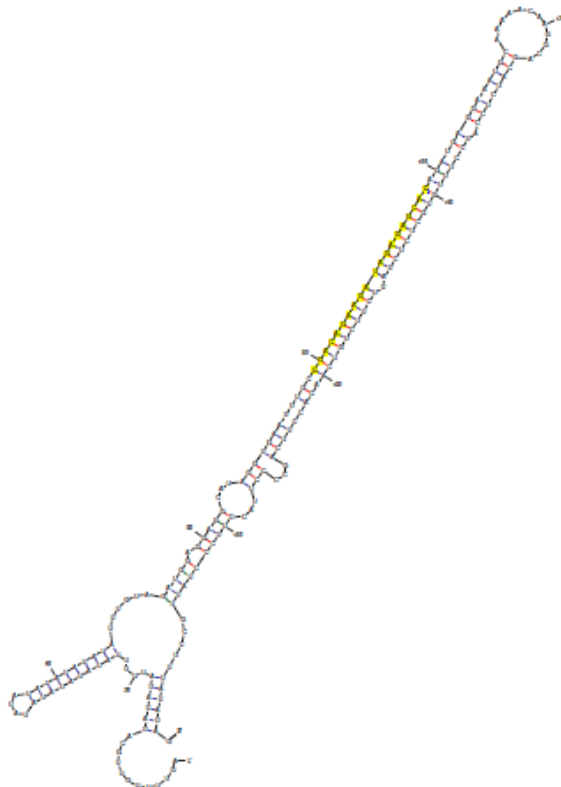

MdMIR156d2

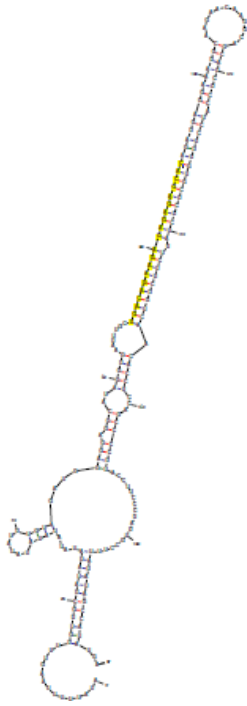

MdMIR156d3

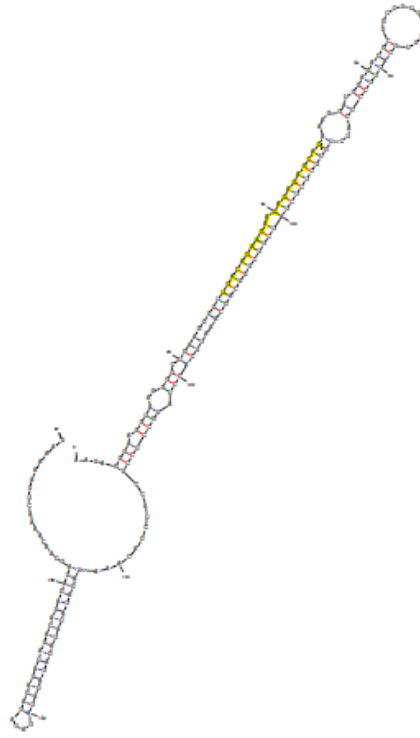

MdMIR156d4

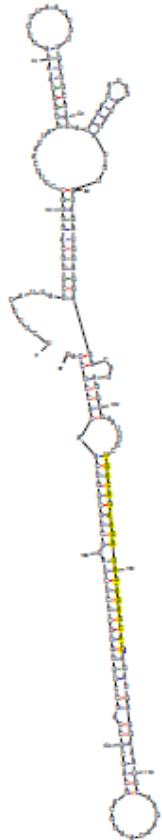

MdMIR156e1

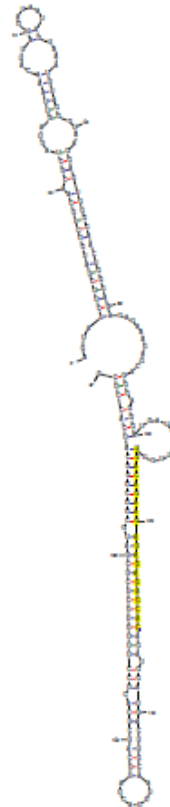

MdMIR156e2

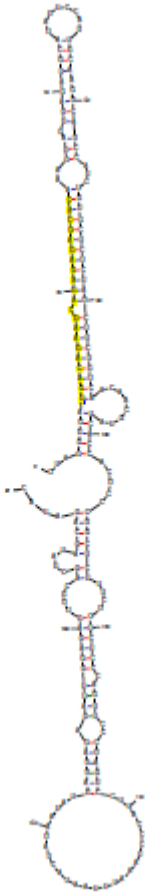

MdMIR156f1

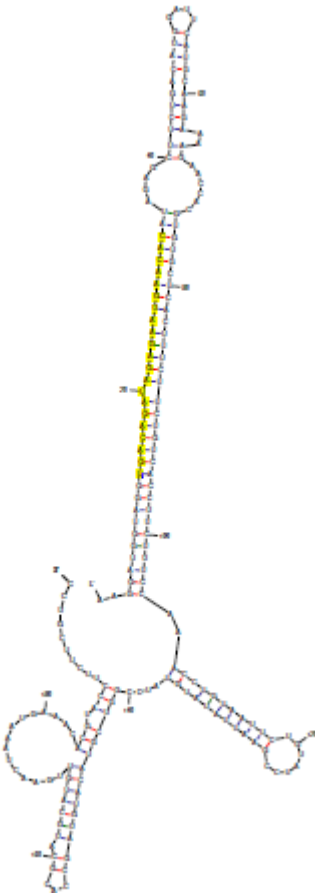

MdMIR156f2

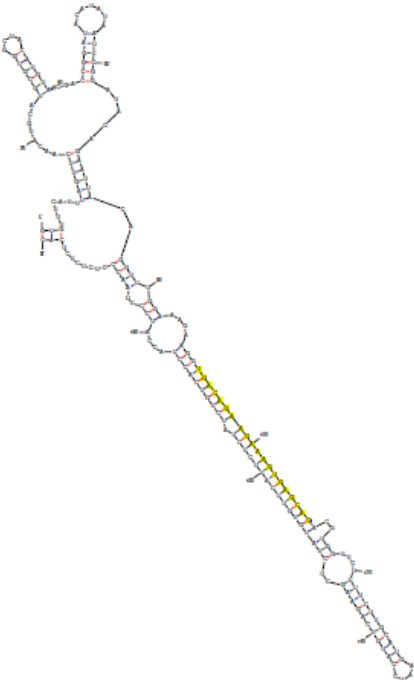

**Table S1 Changes in hydrogen peroxide (H<sub>2</sub>O<sub>2</sub>) concentration in suspension cells of apple ‘Orin’ leaf cultured in medium supplemented with menadione (MED)**

| Average±Standard deviation | Days of treatment |              |             |              |
|----------------------------|-------------------|--------------|-------------|--------------|
|                            | 0                 | 2            | 4           | 6            |
| Control                    | 0.21 ±0.04        | 0.15 ±0.07cd | 0.19 ±0.04b | 0.28 ±0.02c  |
| 50 µM MED                  | 0.21 ±0.04        | 0.59 ±0.15a  | 0.56 ±0.02a | 0.54 ±0.08b  |
| 250 µM MED                 | 0.21 ±0.04        | 0.32 ±0.08bc | 0.51 ±0.16a | 0.41 ±0.02bc |
| 500 µM MED                 | 0.21 ±0.04        | 0.37 ±0.08b  | 0.64 ±0.22a | 0.80 ±0.17a  |

Three replicates for each treatment. Data values in this table represented as ‘average ± standard deviation’. Different letters following data values indicate statistical significance ( $p < 0.05$ ; Duncan’s multiple-range test).



**Table S2 Changes in hydrogen peroxide (H<sub>2</sub>O<sub>2</sub>) concentration in suspension cells of apple 'Orin' leaf cultured in medium supplemented with diphenyleneiodonium (DPI)**

| Average ± Standard deviation | Days of treatment |               |              |               |
|------------------------------|-------------------|---------------|--------------|---------------|
|                              | 0                 | 2             | 4            | 6             |
| Control                      | 0.21 ± 0.04       | 0.15 ± 0.02bc | 0.19 ± 0.04b | 0.28 ± 0.02c  |
| 50 µM DPI                    | 0.21 ± 0.04       | 0.12 ± 0.04c  | 0.56 ± 0.02a | 0.54 ± 0.08b  |
| 250 µM DPI                   | 0.21 ± 0.04       | 0.33 ± 0.12a  | 0.51 ± 0.16a | 0.41 ± 0.02bc |
| 500 µM DPI                   | 0.21 ± 0.04       | 0.30 ± 0.08ab | 0.64 ± 0.22a | 0.80 ± 0.17a  |

Three replicates for each treatment. Data values in this table represented as 'average ± standard deviation'. Different letters following data values indicate statistical significance ( $p < 0.05$ ; Duncan's multiple-range test).

**Table S3 Changes in GSH/GSSG ratio in suspension cells of apple ‘Orin’ leaf cultured in medium supplemented with L-2-oxothiazolidine-4-carboxylic acid (OTC).**

| Average $\pm$ Standard deviation | Days of treatment |                  |                  |                  |
|----------------------------------|-------------------|------------------|------------------|------------------|
|                                  | 0                 | 2                | 4                | 6                |
| Control                          | 2.03 $\pm$ 0.11   | 1.70 $\pm$ 0.03b | 1.80 $\pm$ 0.05b | 2.49 $\pm$ 0.04a |
| 25 $\mu$ M OTC                   | 2.03 $\pm$ 0.11   | 1.57 $\pm$ 0.29b | 1.79 $\pm$ 0.33b | 2.31 $\pm$ 0.10a |
| 50 $\mu$ M OTC                   | 2.03 $\pm$ 0.11   | 2.58 $\pm$ 0.26a | 2.40 $\pm$ 0.27a | 2.34 $\pm$ 0.23a |
| 100 $\mu$ M OTC                  | 2.03 $\pm$ 0.11   | 2.93 $\pm$ 0.57a | 2.31 $\pm$ 0.02a | 2.18 $\pm$ 0.30a |

Three replicates for each treatment. Data values in this table represented as ‘average  $\pm$  standard deviation’. Different letters following data values indicate statistical significance ( $p < 0.05$ ; Duncan’s multiple-range test).

**Table S4 Changes in GSH/GSSG ratio in suspension cells of apple ‘Orin’ leaf cultured in medium supplemented with Buthionine Sulphoximine (BSO).**

| Average $\pm$ Standard deviation | Days of treatment |                   |                  |                  |
|----------------------------------|-------------------|-------------------|------------------|------------------|
|                                  | 0                 | 2                 | 4                | 6                |
| Control                          | 2.03 $\pm$ 0.11   | 1.70 $\pm$ 0.03a  | 1.80 $\pm$ 0.05a | 2.49 $\pm$ 0.04a |
| 0.1mM BSO                        | 2.03 $\pm$ 0.11   | 0.70 $\pm$ 0.18bc | 1.37 $\pm$ 0.05b | 1.55 $\pm$ 0.25b |
| 0.5mM BSO                        | 2.03 $\pm$ 0.11   | 0.93 $\pm$ 0.33b  | 1.25 $\pm$ 0.16b | 0.87 $\pm$ 0.09c |
| 1mM BSO                          | 2.03 $\pm$ 0.11   | 0.47 $\pm$ 0.26c  | 0.47 $\pm$ 0.17c | 0.36 $\pm$ 0.07d |

Three replicates for each treatment. Data values in this table represented as ‘average  $\pm$  standard deviation’. Different letters following data values indicate statistical significance ( $p < 0.05$ ; Duncan’s multiple-range test).

**Table S5 Primer sequences for reverse transcription and RT-PCR of mature miR156 and 5s RNA**

| Primers    | Sequence (5'→3')                                 |
|------------|--------------------------------------------------|
| RT-miR156  | GTCACATCGTATCGTGAAGCTGCGCAGCTGATGTGACGTGCTCAC    |
| miR156     | F: TGCACTAGCGTGTGACAGAAGA<br>R: ACATCGTATCGTGAAG |
| RT-5s rRNA | GTCACATCGTATCGTGAAGCTGCGCAGCTGATGTGACTGGATTGG    |
| 5s rRNA    | F: TGCACTAGCGTGTAGAGGAACC<br>R: ACATCGTATCGTGAAG |

**Table S6 Primer sequences of *MdMIR156s*, *MdHYL1* and *MdSPLs***

| Primers               | Sequence (5'→3')                                              |
|-----------------------|---------------------------------------------------------------|
| <i>MdMIR156 a1</i>    | F:GCTGGGAGTAAGAGGGTATCTA<br>R:CTCCTTCTGCTCTCCCAATTC           |
| <i>MdMIR156 a5</i>    | F:AGCTGACGGAGAGAGAAGT<br>R:CTGAGCGTAGTTGACAGAAGAG             |
| <i>MdMIR156 a6</i>    | F: ACAGAGGCACTTGCCATAAA<br>R: TAATCCGGCAGTGGAAATGG            |
| <i>MdMIR156 a9</i>    | F:AGCTGACGGAGAGAGAAGT<br>R:GAGAGTGAGCACACATGGTATT             |
| <i>MdMIR156 a10</i>   | F:CAGGAAGGAGAATTGGGAGAAA<br>R:TCTCTTCCCGCAAAGGAATG            |
| <i>MdMIR156 a12</i>   | F:CACGCAAAGGTATGGCTTTATAC<br>R:GCAGAGAGAGAGAAGGTGAATG         |
| <i>MdMIR156 d1</i>    | F:GACAGAAGATAGAGAGCACAGATG<br>R: AGGTGTTGACAGAAGAAT           |
| <i>MdHYL1</i>         | F: TTCCCATGCGCCTTCTTT<br>R: GCTGACTGCTCTGCTATCTTAC            |
| <i>MdSPL3</i>         | F: CTCATCAGCAGTCGGCGTCA<br>R:TCGGGGTTAAGAGAAAGGGCAG           |
| <i>MdSPL4</i>         | F:CCCATGTACCTTCATGGAAAGTCAAG<br>R:GCAAATGTTTGCCACCATTTCT      |
| <i>MdSPL7</i>         | F:TGGTGGACTTTGATAAGGTGAAGAGA<br>R:ACTTCGTTTCGTCAGTTGCGGA      |
| <i>MdSPL10&amp;11</i> | F:GGAGCATGAGAGAACTTTTTTCAAGTA<br>R:CACATTGTTGCTTGACGCC        |
| <i>MdSPL12</i>        | F:GTCCTTGCCATGCCCGAT<br>R:TCAGGTTTTCCAGTTCCCACA               |
| <i>MdSPL18</i>        | F:AGGTTTCAGCAGGCGGGACTA<br>R:TCGTCCGAAAGTGATTGGAGG            |
| <i>MdSPL20</i>        | F:GCCAAGAGATACTCCCTACTGACATTC<br>R:CTGGAAGTCTGAAGCTGTGTTG     |
| <i>MdSPL21&amp;22</i> | F:CAAGATATTCGTGCGGATTGATTAA<br>R:CTGTGGAAATGTTGGAATTCTGATGC   |
| <i>MdSPL23</i>        | F:TCCCCTGATGTCCGAGTGCT<br>R:TTTCAGATGCGTGCCCCGAC              |
| <i>MdSPL24</i>        | F:GCTTACCGAGAAAAACAAATCCCAT<br>R:AGACTGAACTGGACTGTGCTGTGT     |
| <i>MdSPL26</i>        | F:GTCACCACTACTCATCCAGGTCAGA<br>R:TCCTCCTCATCATGTGAGCATGAGAATT |
| <i>β-Actin</i>        | F:TGGTGAGGCTCTATTCCAAC<br>R:TGGCATATACTCTGGAGGCT              |

**Table S7 Detailed list of MIR156 gene family in apple**

| <b>MiRNA name</b> | <b>Sequence</b>       | <b>Contig</b> | <b>Length</b> | <b>Strand</b> | <b>Match position</b> | <b>Star sequence</b>   |
|-------------------|-----------------------|---------------|---------------|---------------|-----------------------|------------------------|
| MIR156 a1         | TGACAGAAGAGAGTGAGCAC  | MDC010428.317 | 20            | +             | 6232                  | TGACAGAAGAGAGTGAGCAC   |
| MIR156 a2         | TGACAGAAGAGAGTGAGCAC  | MDC015254.139 | 20            | +             | 2152                  | ACTGTCTATCTCTCACTCGTG  |
| MIR156 a3         | TGACAGAAGAGAGTGAGCAC  | MDC010428.318 | 20            | -             | 7697                  | GTGCTCACTCTCTTCTGTCA   |
| MIR156 a4         | TGACAGAAGAGAGTGAGCAC  | MDC007399.176 | 20            | -             | 6603                  | GTGCTCACTCTCTTCTGTCA   |
| MIR156 a5         | TGACAGAAGAGAGTGAGCAC  | MDC010428.318 | 20            | -             | 17326                 | GTGCTCACTCTCTTCTGTCA   |
| MIR156 a6         | TGACAGAAGAGAGTGAGCAC  | MDC018927.245 | 20            | +             | 11206                 | ACTGTCTTTCTCTGTACTCGTG |
| MIR156 a7         | TGACAGAAGAGAGTGAGCAC  | MDC022546.57  | 20            | -             | 2800                  | CACGAATTAGAGATAGACAGC  |
| MIR156 a8         | TGACAGAAGAGAGTGAGCAC  | MDC010428.308 | 20            | +             | 6933                  | ACTGTCTCTCTCTCCACTC    |
| MIR156 a9         | TGACAGAAGAGAGTGAGCAC  | MDC002074.373 | 20            | -             | 2158                  | ACTGTCTATCTCTCACTCGTG  |
| MIR156 a10        | TGACAGAAGAGAGTGAGCAC  | MDC038184.5   | 20            | -             | 20083                 | GTGCTCACTCTCTTCTGTCA   |
| MIR156 a11        | TGACAGAAGAGAGTGAGCAC  | MDC022169.138 | 20            | +             | 7417                  | ACTGTCTTTCTCTGTACTCGTG |
| MIR156 a12        | TGACAGAAGAGAGTGAGCAC  | MDC015520.219 | 20            | -             | 7939                  | GTGCTCACTCTCTTCTGTCA   |
| MIR156 a13        | TGACAGAAGAGAGTGAGCAC  | MDC013580.195 | 20            | -             | 17918                 | GTGCTCACTCTCTTCTGTCA   |
| MIR156 a14        | TGACAGAAGAGAGTGAGCAC  | MDC022241.434 | 20            | -             | 30246                 | GTGCTCACTCTCTTCTGTCA   |
| MIR156 a15        | TGACAGAAGAGAGTGAGCAC  | MDC011231.822 | 20            | +             | 32339                 | ACTGTCTATCTCTCATTCGTG  |
| MIR156 b1         | CTGACAGAAGATAGAGAGCAC | MDC007657.477 | 21            | -             | 1890                  | GTGCTCACTCTCTTCTGTCA   |
| MIR156 b2         | CTGACAGAAGATAGAGAGCAC | MDC018442.71  | 21            | +             | 5569                  | ACTGTCTTCTTATCTCTCGTG  |
| MIR156 b3         | CTGACAGAAGATAGAGAGCAC | MDC012217.482 | 21            | +             | 9927                  | AACTGTCTTCTTATCTCTCGTG |
| MIR156 b4         | CTGACAGAAGATAGAGAGCAC | MDC018690.154 | 21            | +             | 10957                 | ACTGTCTTCTTATCTCTCGTG  |
| MIR156 c1         | TTGACAGAAGAGAGAGAGCAC | MDC038783.9   | 21            | +             | 1407                  | TACTGTCTYCTYCTTTTCGTG  |
| MIR156 c2         | TTGACAGAAGAGAGAGAGCAC | MDC008280.307 | 21            | +             | 3                     | ACTGTCTTCTTCTTTTCGTG   |
| MIR156 c3         | TTGACAGAAGAGAGAGAGCAC | MDC019519.287 | 21            | -             | 801                   | GTGCTCTCTCTTCTGTCAA    |
| MIR156 c4         | TTGACAGAAGAGAGAGAGCAC | MDC019519.284 | 21            | +             | 5666                  | CTGTCTTCTTTTCTCTCGTG   |
| MIR156 d1         | TGACAGAAGATAGAGAGCAC  | MDC012217.482 | 20            | +             | 9928                  | ACTGTCTTCTTATCTCTCGTG  |
| MIR156 d2         | TGACAGAAGATAGAGAGCAC  | MDC018442.71  | 20            | +             | 5570                  | ACTGTCTTCTTATCTCTCGTG  |
| MIR156 d3         | TGACAGAAGATAGAGAGCAC  | MDC007657.477 | 20            | -             | 1890                  | GTGCTCTCTATCTTCTGTCA   |
| MIR156 d4         | TGACAGAAGATAGAGAGCAC  | MDC018690.154 | 20            | +             | 10958                 | ACTGTCTTCTTATCTCTCGTG  |
| MIR156 e1         | TTGACAGAAGATAGAGAGCAC | MDC002621.233 | 21            | +             | 15660                 | ACTGTCTTCGTATCTCTCGTG  |
| MIR156 e2         | TTGACAGAAGATAGAGAGCAC | MDC002441.399 | 21            | -             | 5519                  | GTGCTCACTCTCTTCTGTCA   |
| MIR156 f1         | TGACAGAAGAAAGTGAGCAC  | MDC013721.403 | 20            | -             | 6675                  | CACAAGTAAGAGATAGACAGT  |
| MIR156 f2         | TGACAGAAGAAAGTGAGCAC  | MDC013721.399 | 20            | +             | 9390                  | ACTGTCTATCTCTTACTTGTG  |

**Table S8 Primer sequences of *MdRboh* family members**

| Primers        | Sequence (5'→3')             |
|----------------|------------------------------|
| <i>Rboh D1</i> | F:GCACCAAGTTACCACACAAATC     |
| MDP0000703059  | R:GTTCCCGTGTACCCAATAA        |
| <i>Rboh D2</i> | F:GCAGAGAGTCTGGGTTATGATG     |
| MDP0000262620  | R:CTCGAATGCCTCCTCTTTTC       |
| <i>Rboh D3</i> | F:CGGCACAGGACTACAAGAAATA     |
| MDP0000421679  | R:TCATCTTCCTTGCCCTTCATC      |
| <i>Rboh H1</i> | F:ATGGGCATCAAGAGACATCTG      |
| MDP0000160005  | R:TGCTCCCTTGTTACCCAATAAA     |
| <i>Rboh H2</i> | F:GATGCGAGGTCTGCTCTTATT      |
| MDP0000195681  | R:TGAGTTCTTATCCGGCTTTCTG     |
| <i>Rboh K1</i> | F:CTAATAAGCACTATAACAAGCGTTGC |
| MDP0000280452  | R:TGAGAAGATGTTGAACCAGTCC     |
| <i>Rboh K2</i> | F:TTTGGTGACCCCTTCAGTCT       |
| MDP0000261507  | R:CGGAGTCCGGGAGAGAA          |

**Table S9 Primer sequences of *MdHXX* family members**

| Primers       | Sequence (5'→3')            |
|---------------|-----------------------------|
| <i>HXX1</i>   | F: CTTTCTGCTGCTGGGATCTT     |
| MDP0000181206 | R: TGGTGCGGAATTCAGTGTAG     |
| <i>HXX2</i>   | F: GCAATGGATGGTGGTTTGTATG   |
| MDP0000309677 | R: GTTTGAGTGCTCGACAGAAATG   |
| <i>HXX3</i>   | F: GGTAGCTTTGGATGGTGGATTA   |
| MDP0000823956 | R: ATCCCAGACCCATCGTTAGA     |
| <i>HXX4</i>   | F: GGAACGTGCACATGCAATAC     |
| MDP0000643891 | R: CTGTGAAGCAGTGAAGGAGTT    |
| <i>HXX5</i>   | F: CGGAGAGGAAGTTGCAGAAA     |
| MDP0000849870 | R: CGATTCCTAGGTATTGTGAGTGAG |
| <i>HXX7</i>   | F: GAGCAAGATATTGGGACGATGA   |
| MDP0000251415 | R: GGCCCTGTAGTTTGGGAATAG    |
| <i>HXX8</i>   | F: CACTAGATCTTGGCGGTAATAAC  |
| MDP0000175245 | R: GAGGAATGGCTTGTTCGATACA   |
| <i>HXX9</i>   | F: CCTGGAGCTAAGCTGTGAAA     |
| MDP0000316781 | R: CCATCGGGTAGTTTATCCACAA   |
